# Supplementary material
Source: PubMed Central journal article supplement (PMC5982732)
Supplement: mxy003wirtzwebmaterialfinal.pdf [file mxy003wirtzwebmaterialfinal.pdf]

## HIV and Viral Hepatitis among Imprisoned Key Populations

### Web Appendix 1

#### Search terms:

##### PUBMED:

###### #1 HIV

HIV [MeSH] OR "Acquired Immunodeficiency Syndrome Virus"[MeSH] OR "AIDS-Related Complex"[MeSH] OR "AIDS-Related Opportunistic Infections"[MeSH] OR "HIV Infections"[MeSH] OR "HIV Seropositivity"[MeSH] OR "AIDS-Related Complex"[MeSH] OR "HIV Seroprevalence"[MeSH] OR "HIV-1"[MeSH] OR "HIV-2"[MeSH] OR "human immunodeficiency virus" [tw] OR "human immune deficiency virus" OR HIV[tw] OR "HIV/AIDS"[tw] OR "HIV-infected"[tw] OR AIDS [tw]

###### #2 HCV

"Hepatitis C"[MeSH] OR "Hepatitis C virus" [MeSH] OR "HCV"[tw] OR "Hepatitis C"[tw] OR "liver fibrosis"[tw] OR "viral hepatitis" [tw]

###### #3 HBV

"Hepatitis B"[MeSH] OR "Hepatitis B virus" [MeSH] OR "HBV"[tw] OR "Hepatitis B"[tw]

###### #4 TB

Tuberculosis [MeSH] OR "Mycobacterium tuberculosis"[MeSH] OR "Mycobacterium tuberculosis" [tw] OR Tuberculosis [tw] OR "TB"[MeSH] OR "MDR-TB"[tw] OR "XDR-TB"[tw] OR "Mtb"[tw]

###### #5 Prison

Prisons [MeSH] OR Prisoners [MeSH] OR Criminals [MeSH] OR Prison\* [tw] OR "Concentration Camps" [MeSH] OR Incarcerat\* [tw] OR Penitentiari\* [tw] OR imprison\* [tw] OR penal institute\* [tw] OR Jail\* [tw] OR inmate\* [tw] OR "Correctional setting" [tw] OR "Correctional settings" [tw] OR detain\* [tw] OR detention\* [tw] OR "Correctional Centre" [tw] OR "Correctional Centres" [tw] OR incarcerat\* [tw] OR inmate\* [tw]

###### #6 Compulsory Drug Detention Centers

"compulsory drug detention center" [tw] "compulsory drug detention" [tw] OR "compulsory drug treatment" OR compulsory rehabil\* OR "correction center" [tw] correction\* facilit\* [tw] OR "re-education through labor" [tw] "laojiaosuo"[tw] OR "long-term detention" [tw] OR labor camp\* [tw]

(#1 OR #2 OR #3 OR #4) AND (#5 OR #6)

Restricted to last 10 years

##### Embase:

###### #1 HIV

'Human immunodeficiency virus'/exp OR 'acquired immune deficiency syndrome'/exp OR 'AIDS related complex'/exp OR 'AIDS-Related Opportunistic Infections' OR 'Human immunodeficiency virus infection'/exp OR 'HIV Seropositivity' OR 'AIDS-Related Complex' OR 'HIV Seroprevalence' OR 'Human immunodeficiency virus 1'/exp OR 'Human immunodeficiency virus 2'/exp OR 'human immune deficiency virus' OR 'HIV' OR 'HIV/AIDS' OR 'HIV-infected' OR 'AIDS'

###### #2 HCV

'hepatitis C'/exp OR 'Hepatitis C virus'/exp OR 'HCV' OR (Hepatitis NEXT/1 C) OR (liver NEXT/1 fibrosis) OR (viral NEXT/1 hepatitis)

#3 HBV

'hepatitis B'/exp OR 'Hepatitis B virus'/exp OR 'HBV' OR (Hepatitis NEXT/1 B)

#4 TB

'tuberculosis'/exp OR 'Mycobacterium tuberculosis'/exp OR 'drug resistant tuberculosis'/exp OR 'extensively drug resistant tuberculosis'/exp OR (Mycobacterium NEXT/1 tuberculosis) OR 'Tuberculosis' OR 'TB' OR 'MDR-TB' OR 'XDR-TB' OR 'Mtb'

#5 Prison

'prison'/exp OR 'prisoner'/exp OR 'offender'/exp OR Prison\* OR (Concentration NEXT/1 Camp\*) OR Incarcerate\* OR Penitentiary\* OR imprison\* OR (penal NEXT/1 institute\*) OR Jail\* OR inmate\* OR (Correctional AND setting\*) OR detain\* OR detention\* OR (Correctional AND Centre\*) OR inmate\*

#6 Compulsory Drug Detention Centers

'detention camp'/exp OR 'compulsory drug detention' OR 'compulsory drug detention' OR 'compulsory drug treatment' OR (compulsory NEXT/1 rehab\*) OR (correction\* AND center\*) OR (correction\* NEXT/1 facilit\*) OR 're-education through labor' OR 'laojiaosuo' OR ('long-term' NEXT/1 detention) OR (labor NEXT/1 camp\*)

(#1 OR #2 OR #3 OR #4) AND (#5 OR #6)

Restricted to last 10 years

#### **CINAHL:**

#1 HIV

MH "Human immunodeficiency virus" OR MH "HIV-1" OR MH "AIDS Serodiagnosis" OR MH "HIV Infections" OR MH "HIV Seropositivity" OR MH "Acquired Immunodeficiency Syndrome" OR TX "acquired immune deficiency syndrome" OR TX "AIDS related complex" OR TX "AIDS-Related Opportunistic Infections" OR TX "Human immunodeficiency virus infection" OR TX "HIV Seropositivity" OR TX "AIDS-Related Complex" OR TX "HIV Seroprevalence" OR TX "Human immunodeficiency virus 1" OR TX "Human immunodeficiency virus 2" OR TX "human immune deficiency virus" OR TX "HIV" OR TX "HIV/AIDS" OR TX "HIV-infected" OR TX "AIDS"

#2 HCV

MH "hepatitis C" OR TX "Hepatitis C virus" OR TX "HCV" OR TX "Hepatitis C" OR TX "liver fibrosis" OR TX "viral hepatitis"

#3 HBV

MH "hepatitis B" OR TX "Hepatitis B virus" OR TX "HBV" OR TX "Hepatitis B"

#4 TB

MH "tuberculosis" OR MH "Mycobacterium tuberculosis" OR MH "Tuberculosis, Multidrug-Resistant" OR TX "drug resistant tuberculosis" OR TX "extensively drug resistant tuberculosis" OR TX "Mycobacterium tuberculosis" OR TX "Tuberculosis" OR TX "TB" OR TX "MDR-TB" OR TX "XDR-TB" OR TX "Mtb"

#5 Prison

MH "Correctional Facilities" OR MH "prisoners" OR TX "Prison\*" OR TX "Incarcerate\*" OR TX "Penitentiary" OR TX "Penitentiaries" OR TX "imprisonment" OR TX "penal institute\*" OR TX "Jail" OR "Jails" OR TX "inmate" OR TX "inmates" OR TX "correctional setting" OR "Correctional settings" OR TX "detain" OR TX "detention" OR TX "detainees" OR TX Correctional Centre" OR TX "Correctional Centres"

#6 Compulsory Drug Detention Centers

TX "compulsory drug detention center" OR TX "compulsory drug detention" OR TX "compulsory drug treatment" OR TX "compulsory rehabilitation" OR TX "correctional facility" OR TX "corrections facility" OR TX "correctional

facilities" OR TX "corrections facilities" OR TX "re-education through labor" OR TX "laojiaosuo" OR TX "long-term detention" OR TX "labor camp" OR TX "labor camps"

(S1 OR S2 OR S3 OR S4) AND (S5 OR S6)

Restricted to last 10 years

**Criminal Justice Abstracts with Full Text:**

**#1 HIV**

MH "Human immunodeficiency virus" OR MH "HIV-1" OR MH "AIDS Serodiagnosis" OR MH "HIV Infections" OR MH "HIV Seropositivity" OR MH "Acquired Immunodeficiency Syndrome" OR TX "acquired immune deficiency syndrome" OR TX "AIDS related complex" OR TX "AIDS-Related Opportunistic Infections" OR TX "Human immunodeficiency virus infection" OR TX "HIV Seropositivity" OR TX "AIDS-Related Complex" OR TX "HIV Seroprevalence" OR TX "Human immunodeficiency virus 1" OR TX "Human immunodeficiency virus 2" OR TX "human immune deficiency virus" OR TX "HIV" OR TX "HIV/AIDS" OR TX "HIV-infected" OR TX "AIDS"

**#2 HCV**

MH "hepatitis C" OR TX "Hepatitis C virus" OR TX "HCV" OR TX "Hepatitis C" OR TX "liver fibrosis" OR TX "viral hepatitis"

**#3 HBV**

MH "hepatitis B" OR TX "Hepatitis B virus" OR TX "HBV" OR TX "Hepatitis B"

**#4 TB**

MH "tuberculosis" OR MH "Mycobacterium tuberculosis" OR MH "Tuberculosis, Multidrug-Resistant" OR TX "drug resistant tuberculosis" OR TX "extensively drug resistant tuberculosis" OR TX "Mycobacterium tuberculosis" OR TX "Tuberculosis" OR TX "TB" OR TX "MDR-TB" OR TX "XDR-TB" OR TX "Mtb"

**#5 Prison**

MH "Correctional Facilities" OR MH "prisoners" OR TX "Prison\*" OR TX "Incarcerate\*" OR TX "Penitentiary" OR TX "Penitentiaries" OR TX "imprisonment" OR TX "penal institute\*" OR TX "Jail" OR "Jails" OR TX "inmate" OR TX "inmates" OR TX "correctional setting" OR "Correctional settings" OR TX "detain" OR TX "detention" OR TX "detainees" OR TX Correctional Centre" OR TX "Correctional Centres"

**#6 Compulsory Drug Detention Centers**

TX "compulsory drug detention center" OR TX "compulsory drug detention" OR TX "compulsory drug treatment" OR TX "compulsory rehabilitation" OR TX "correctional facility" OR TX "corrections facility" OR TX "correctional facilities" OR TX "corrections facilities" OR TX "re-education through labor" OR TX "laojiaosuo" OR TX "long-term detention" OR TX "labor camp" OR TX "labor camps"

(S1 OR S2 OR S3 OR S4) AND (S5 OR S6)

Restricted to last 10 years

**Web Figure 1.** PRISMA search diagram.

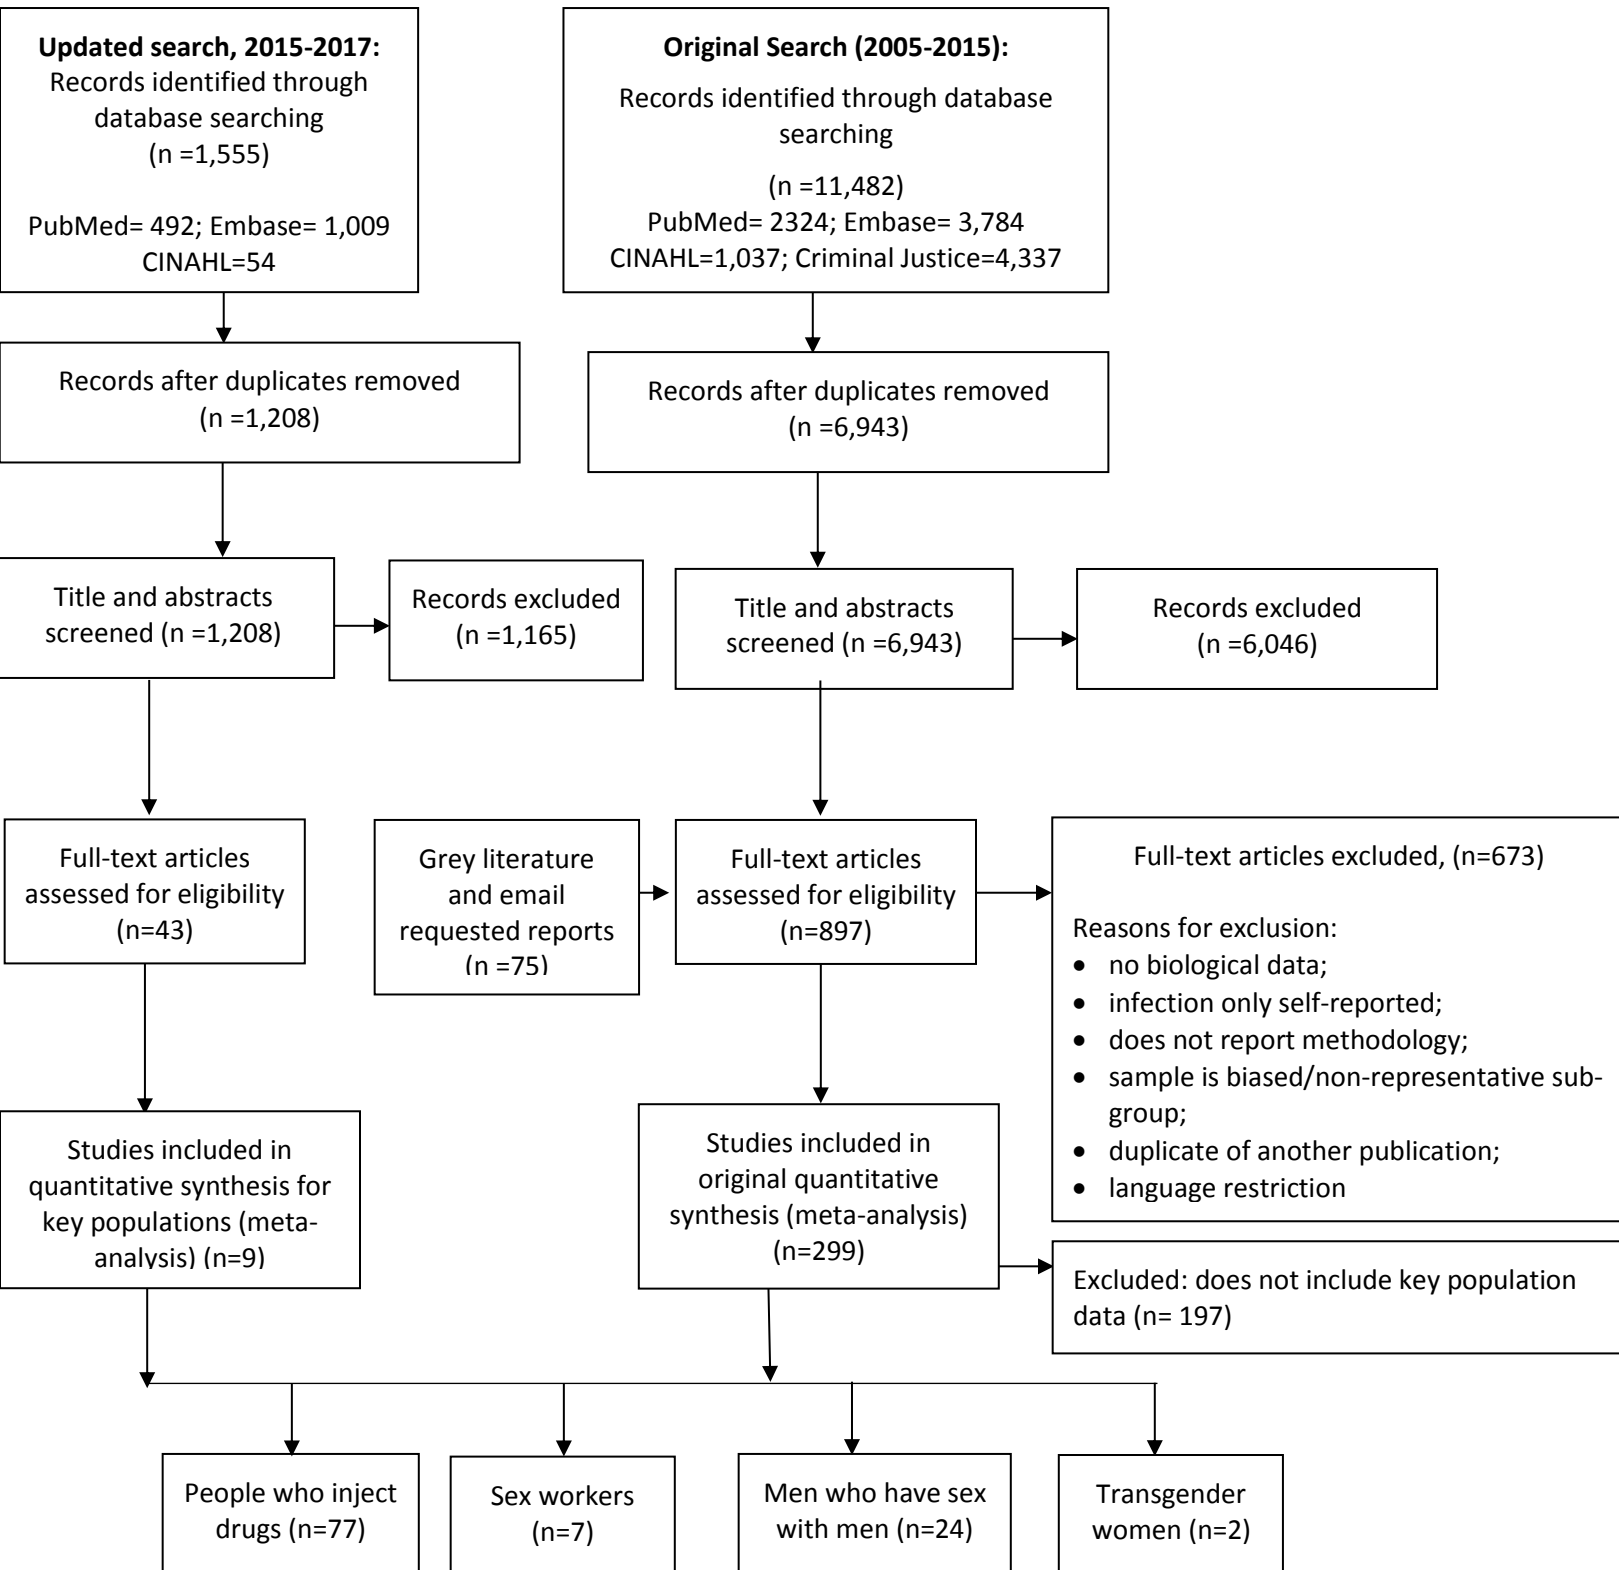

**Web Table 1.** HIV and viral hepatitis among people who inject drugs in prison and closed settings.

| Study Data              |                          |                                                             |                   |                  |                             |                         |                             |                         |                                  |                              |                                             |                  |
|-------------------------|--------------------------|-------------------------------------------------------------|-------------------|------------------|-----------------------------|-------------------------|-----------------------------|-------------------------|----------------------------------|------------------------------|---------------------------------------------|------------------|
| Ref                     | National or Sub-national | Subnational area                                            | Facility Type     | Year(s) of study | HIV prevalence              |                         | HBV prevalence              |                         | PWID HCV prevalence              |                              | Coverage of HIV, HBV, HCV prevention & care | Comments         |
|                         |                          |                                                             |                   |                  | non-PWID HIV prevalence (%) | PWID HIV prevalence (%) | non-PWID HBV prevalence (%) | PWID HBV prevalence (%) | non-PWID anti-HCV prevalence (%) | PWID anti-HCV prevalence (%) |                                             |                  |
| <b>ASIA AND PACIFIC</b> |                          |                                                             |                   |                  |                             |                         |                             |                         |                                  |                              |                                             |                  |
| <b>Australia</b>        |                          |                                                             |                   |                  |                             |                         |                             |                         |                                  |                              |                                             |                  |
| (1)                     | National                 | NA                                                          | Prison            | 2004             | 0.5%                        | 0.8%                    | 9.0%                        | 27.0%                   | 4.0%                             | 56.0%                        | NR                                          |                  |
| (2)                     | National                 | NA                                                          | Prison            | 2010             | 0.0%                        | 0.0%                    | 19.7%                       | 18.8%                   | 1.0%                             | 51.0%                        | NR                                          |                  |
| (3)                     | National                 | NA                                                          | Prison            | 2013             | 0.0%                        | 0.0%                    | 16.9%                       | 19.0%                   | 4.4%                             | 58.2%                        | NR                                          |                  |
| (4)                     | Sub-national             | New South Wales, Queensland, Tasmania and Western Australia | Reception Prisons | 2004             | 0.6%                        | 0.8%                    | 0.6%                        | 0.8%                    | 3.3%                             | 56.6%                        | NR                                          |                  |
| (4)                     | Sub-national             | New South Wales, Queensland, Tasmania and Western Australia | Reception Prisons | 2007             | 0.5%                        | 0.9%                    | 0.5%                        | 0.9%                    | 3.5%                             | 57.7%                        | NR                                          |                  |
| (4)                     | Sub-national             | New South Wales, Queensland, Tasmania and Western Australia | Reception Prisons | 2010             | 0.0%                        | 0.0%                    | 0.0%                        | 0.0%                    | 0.7%                             | 52.0%                        | NR                                          |                  |
| (5)                     | Sub-national             | Queensland                                                  | Prison            | 2008-2010        | NR                          | NR                      | NR                          | NR                      | NR                               | 47.4%                        | NR                                          |                  |
| (6)                     | Sub-national             | Queensland                                                  | Prison            | NR               | NR                          | NR                      | NR                          | NR                      | NR                               | 20.7%                        | NR                                          | Sample is <25yo  |
| (6)                     | Sub-national             | Queensland                                                  | Prison            | NR               | NR                          | NR                      | NR                          | NR                      | NR                               | 29.4%                        | NR                                          | Sample is >=25yo |
| <b>China</b>            |                          |                                                             |                   |                  |                             |                         |                             |                         |                                  |                              |                                             |                  |
| (7)                     | Sub-national             | Beijing                                                     | CDDC              | 2007             | 1.9%                        | 10.3%                   | NR                          | NR                      | NR                               | NR                           | NR                                          |                  |

| Study Data         |                          |                  |                          |                  |                             |                         |                             |                         |                                  |                              |                                                                              |                                 |
|--------------------|--------------------------|------------------|--------------------------|------------------|-----------------------------|-------------------------|-----------------------------|-------------------------|----------------------------------|------------------------------|------------------------------------------------------------------------------|---------------------------------|
| Ref                | National or Sub-national | Subnational area | Facility Type            | Year(s) of study | HIV prevalence              |                         | HBV prevalence              |                         | PWID HCV prevalence              |                              | Coverage of HIV, HBV, HCV prevention & care                                  | Comments                        |
|                    |                          |                  |                          |                  | non-PWID HIV prevalence (%) | PWID HIV prevalence (%) | non-PWID HBV prevalence (%) | PWID HBV prevalence (%) | non-PWID anti-HCV prevalence (%) | PWID anti-HCV prevalence (%) |                                                                              |                                 |
| <b>Indonesia</b>   |                          |                  |                          |                  |                             |                         |                             |                         |                                  |                              |                                                                              |                                 |
| (8)                | Sub-national             | West Java        | Narcotic referral prison | 2007-2010        | 2.1%                        | 25.0%                   | NR                          | NR                      | NR                               | NR                           | NR                                                                           | Targeted screening (2009-2010)* |
| (8)                | Sub-national             | West Java        | Narcotic referral prison | 2007-2010        | 0.4%                        | 37.0%                   | NR                          | NR                      | NR                               | NR                           | NR                                                                           | Routine screening (2007-2009)   |
| (9)                | Sub-national             | Central Java     | Prison                   | 2009             | 1.8%                        | 13.8%                   | 3.9%                        | 1.1%                    | 28.8%                            | 50.0%                        | NR                                                                           |                                 |
| <b>Philippines</b> |                          |                  |                          |                  |                             |                         |                             |                         |                                  |                              |                                                                              |                                 |
| (10)               | Sub-national             | Cebu             | Prison                   | 2014-2015        | NR                          | NR                      | 6.1%                        | 9.7%                    | 13.74%                           | 81.34%                       | NR                                                                           |                                 |
| <b>Taiwan</b>      |                          |                  |                          |                  |                             |                         |                             |                         |                                  |                              |                                                                              |                                 |
| (11)               | Sub-national             | Taoyuan          | CDDC                     | 2005             | 0.5%                        | 25.5%                   | NR                          | NR                      | NR                               | 89.6%                        | NR                                                                           | Sample is male only             |
| (12)               | Sub-national             | Southern Taiwan  | Jail                     | 2008-2010        | NR                          | 52.8%                   | NR                          | 15.3%                   | NR                               | 91.3%                        | NR                                                                           |                                 |
| (13)               | National                 | NA               | CDDC                     | 2006             | NR                          | 24.2%                   | NR                          | NR                      | NR                               | NR                           | Of HIV+ PWID, 72% in HIV care, 9% on ART                                     |                                 |
| (13)               | National                 | NA               | CDDC                     | 2007             | NR                          | 20.1%                   | NR                          | NR                      | NR                               | NR                           | Of HIV+ PWID, 75% in HIV care, 9% on ART                                     |                                 |
| (13)               | National                 | NA               | CDDC                     | 2008             | NR                          | 17.1%                   | NR                          | NR                      | NR                               | NR                           | Of HIV+ PWID, 4341 attended a designated AIDS/HIV clinic and 582 were on ART |                                 |
| (13)               | National                 | NA               | CDDC                     | 2009             | NR                          | 22.7%                   | NR                          | NR                      | NR                               | NR                           | Of HIV+ PWID, 75% in HIV care, 12%on ART                                     |                                 |

| Ref                                                                                               | Study Data               |                             |                                        |                  | HIV prevalence                                    |                         | HBV prevalence                                  |                         | PWID HCV prevalence                               |                              | Coverage of HIV, HBV, HCV prevention & care | Comments |
|---------------------------------------------------------------------------------------------------|--------------------------|-----------------------------|----------------------------------------|------------------|---------------------------------------------------|-------------------------|-------------------------------------------------|-------------------------|---------------------------------------------------|------------------------------|---------------------------------------------|----------|
|                                                                                                   | National or Sub-national | Subnational area            | Facility Type                          | Year(s) of study | non-PWID HIV prevalence (%)                       | PWID HIV prevalence (%) | non-PWID HBV prevalence (%)                     | PWID HBV prevalence (%) | non-PWID anti-HCV prevalence (%)                  | PWID anti-HCV prevalence (%) |                                             |          |
| (13)                                                                                              | National                 | NA                          | CDDC                                   | 2010             | NR                                                | 26.9%                   | NR                                              | NR                      | NR                                                | NR                           | Of HIV+ PWID, 76% in HIV care, 19% on ART   |          |
| (14)                                                                                              | National                 | NA                          | CDDC                                   | 2005-2007        | NR                                                | 42.0%                   | NR                                              | NR                      | NR                                                | NR                           | NR                                          |          |
| (15)                                                                                              | Sub-national             | Penghu County (West Taiwan) | Correction center                      | 1997             | NR                                                | NR                      | NR                                              | 22.2%                   | NR                                                | 59.4%                        | NR                                          |          |
| (16)                                                                                              | National                 | NA                          | Prisons, Detention Juvenile correction | 1994             | NR                                                | NR                      | 12.8%                                           | 26.4%                   | NR                                                | NR                           | NR                                          |          |
| <b>Pooled prevalence ratio among PWID compared to non-PWID in Asia and the Pacific</b>            |                          |                             |                                        |                  | 13.8 (95%CI:3.9-50.3; $p<0.001$ ; $I^2: 83.4\%$ ) |                         | 1.5 (95%CI: 1.0-2.3; $p=0.05$ ; $I^2: 83.8\%$ ) |                         | 9.0 (95%CI: 4.1-19.7; $p<0.001$ ; $I^2: 96.4\%$ ) |                              |                                             |          |
| <b>EASTERN EUROPE AND CENTRAL ASIA</b>                                                            |                          |                             |                                        |                  |                                                   |                         |                                                 |                         |                                                   |                              |                                             |          |
| <b>Bosnia and Herzegovina</b>                                                                     |                          |                             |                                        |                  |                                                   |                         |                                                 |                         |                                                   |                              |                                             |          |
| (17)                                                                                              | Sub-national             | Zenica                      | High Security Male Penitentiary        | 2013             | NR                                                | NR                      | NR                                              | NR                      | 4.9%                                              | 33.3%                        | NR                                          |          |
| <b>Bulgaria</b>                                                                                   |                          |                             |                                        |                  |                                                   |                         |                                                 |                         |                                                   |                              |                                             |          |
| (18)                                                                                              | Sub-national             | NR                          | Prison                                 | 2009             | NR                                                | NR                      | NR                                              | NR                      | 26.5%                                             | 61.4%                        | NR                                          |          |
| (19)                                                                                              | Sub-national             | NR                          | Juvenile correctional facility         | 2010             | NR                                                | NR                      | NR                                              | NR                      | 26.4%                                             | 66.7%                        | NR                                          |          |
| <b>Croatia</b>                                                                                    |                          |                             |                                        |                  |                                                   |                         |                                                 |                         |                                                   |                              |                                             |          |
| (20)                                                                                              | Sub-national             | Remetinec in Zagreb         | Prison                                 | 2007             | NR                                                | 0.0%                    | NR                                              | 24.0%                   | NR                                                | 44.0%                        | NR                                          |          |
| <b>Pooled prevalence ratio among PWID compared to non-PWID in Eastern Europe and Central Asia</b> |                          |                             |                                        |                  | Insufficient data                                 |                         |                                                 | Insufficient data       |                                                   | Insufficient data            |                                             |          |

| Study Data                                                                                               |                          |                               |                                    |                  |                                                               |                         |                             |                          |                                  |                                                                  |                                             |                                |
|----------------------------------------------------------------------------------------------------------|--------------------------|-------------------------------|------------------------------------|------------------|---------------------------------------------------------------|-------------------------|-----------------------------|--------------------------|----------------------------------|------------------------------------------------------------------|---------------------------------------------|--------------------------------|
| Ref                                                                                                      | National or Sub-national | Subnational area              | Facility Type                      | Year(s) of study | HIV prevalence                                                |                         | HBV prevalence              |                          | PWID HCV prevalence              |                                                                  | Coverage of HIV, HBV, HCV prevention & care | Comments                       |
|                                                                                                          |                          |                               |                                    |                  | non-PWID HIV prevalence (%)                                   | PWID HIV prevalence (%) | non-PWID HBV prevalence (%) | PWID HBV prevalence (%)  | non-PWID anti-HCV prevalence (%) | PWID anti-HCV prevalence (%)                                     |                                             |                                |
| <b>Latin America and the Caribbean</b>                                                                   |                          |                               |                                    |                  |                                                               |                         |                             |                          |                                  |                                                                  |                                             |                                |
| <b>Belize</b>                                                                                            |                          |                               |                                    |                  |                                                               |                         |                             |                          |                                  |                                                                  |                                             |                                |
| (21)                                                                                                     | National                 | NA                            | Central Prison                     | 2005             | 3.9%                                                          | 14.3%                   | NR                          | NR                       | NR                               | NR                                                               | NR                                          |                                |
| <b>Brazil</b>                                                                                            |                          |                               |                                    |                  |                                                               |                         |                             |                          |                                  |                                                                  |                                             |                                |
| (22)                                                                                                     | Sub-national             | Goiás, Central Brazil         | Prisons                            | 2005             | NR                                                            | NR                      | 24.1%                       | 66.7%                    | 3.5%                             | 66.7%                                                            | NR                                          |                                |
| (23)                                                                                                     | Sub-national             | Sao Paulo                     | Prison                             | 2003             | 3.0%                                                          | 34.5%                   | NR                          | NR                       | NR                               | NR                                                               | NR                                          |                                |
| (24)                                                                                                     | Sub-national             | Sao Paulo                     | Prison                             | 2003             | NR                                                            | NR                      | NR                          | NR                       | 5.3%                             | 44.8%                                                            | NR                                          |                                |
| (25)                                                                                                     | Sub-national             | Sao Paulo                     | Prison                             | 2007             | 1.0%                                                          | 13.8%                   | 19.0%                       | 51.7%                    | 3.5%                             | 34.5%                                                            | NR                                          |                                |
| (26)                                                                                                     | Sub-national             | Colatina                      | Prisons                            | 2010             | NR                                                            | NR                      | NR                          | NR                       | NR                               | 0.4%                                                             | NR                                          |                                |
| (27)                                                                                                     | Sub-national             | Mato Grosso do Sul            | Prison                             | 2009             | NR                                                            | NR                      | NR                          | NR                       | 2.6%                             | 24.7%                                                            | NR                                          |                                |
| (28)                                                                                                     | Sub-national             | Mato Grosso do Sul            | Prison                             | 2013-2014        | NR                                                            | NR                      | NR                          | NR                       | 2.4%                             | 25.0%                                                            |                                             |                                |
| (29)                                                                                                     | Sub-national             | Sergipe                       | Prison                             | 2009-2010        | NR                                                            | NR                      | NR                          | NR                       | 1.1%                             | 20.6%                                                            | NR                                          |                                |
| <b>Mexico</b>                                                                                            |                          |                               |                                    |                  |                                                               |                         |                             |                          |                                  |                                                                  |                                             |                                |
| (30)                                                                                                     | Sub-national             | Durango                       | Correctional facility              | 2001-2002        | NR                                                            | NR                      | NR                          | NR                       | 7.0%                             | 66.7%                                                            | NR                                          |                                |
| <b><i>Pooled prevalence ratio among PWID compared to non-PWID in Latin America and the Caribbean</i></b> |                          |                               |                                    |                  | <i>10.5 (95%CI: 5.5-20.0; p&lt;0.001; I<sup>2</sup>:0.0%)</i> |                         |                             | <i>Insufficient data</i> |                                  | <i>10.4 (95%CI: 7.9 – 13.7; p&lt;0.001; I<sup>2</sup>: 0.0%)</i> |                                             |                                |
| <b>MIDDLE EAST AND NORTH AFRICA</b>                                                                      |                          |                               |                                    |                  |                                                               |                         |                             |                          |                                  |                                                                  |                                             |                                |
| <b>Iran</b>                                                                                              |                          |                               |                                    |                  |                                                               |                         |                             |                          |                                  |                                                                  |                                             |                                |
| (31)                                                                                                     | Sub-national             | Hamedan                       | Prison                             | 2002             | 1.1%                                                          | 0.7%                    | NR                          | NR                       | 29.1%                            | 31.5%                                                            | NR                                          | Sample is people who use drugs |
| (32)                                                                                                     | Sub-national             | Assadabad & Isfahan Provinces | Central Prison and Drop in Centers | NR               | NR                                                            | NR                      | NR                          | NR                       | NR                               | 43.4%                                                            | NR                                          |                                |



| Study Data |                          |                          |                     |                  |                             |                         |                             |                         |                                  |                              |                                             |                       |
|------------|--------------------------|--------------------------|---------------------|------------------|-----------------------------|-------------------------|-----------------------------|-------------------------|----------------------------------|------------------------------|---------------------------------------------|-----------------------|
| Ref        | National or Sub-national | Subnational area         | Facility Type       | Year(s) of study | HIV prevalence              |                         | HBV prevalence              |                         | PWID HCV prevalence              |                              | Coverage of HIV, HBV, HCV prevention & care | Comments              |
|            |                          |                          |                     |                  | non-PWID HIV prevalence (%) | PWID HIV prevalence (%) | non-PWID HBV prevalence (%) | PWID HBV prevalence (%) | non-PWID anti-HCV prevalence (%) | PWID anti-HCV prevalence (%) |                                             |                       |
| (33)       | Sub-national             | Gorgan                   | Central Prison      | 2002-2003        | NR                          | 5.8%                    | NR                          | 4.1%                    | NR                               | 23.1%                        | NR                                          |                       |
| (34)       | Sub-national             | Hormozgan                | Prison              | 2002             | NR                          | 15.1%                   | NR                          | 4.7%                    | NR                               | 64.8%                        | NR                                          |                       |
| (35)       | Sub-national             | Isfahan                  | Prison              | 2009             | NR                          | 6.4%                    | NR                          | NR                      | NR                               | NR                           | NR                                          | Sample is PWID        |
| (36)       | Sub-national             | Iran                     | CDDC                | 2006             | NR                          | 24.4%                   | NR                          | NR                      | NR                               | 80.0%                        | NR                                          |                       |
| (37)       | Sub-national             | Isfahan                  | Prison              | 2009             | NR                          | NR                      | NR                          | NR                      | NR                               | 41.6%                        | NR                                          |                       |
| (38)       | Sub-national             | Shiraz, Fars Province    | Jail                | 2007             | NR                          | 6.6%                    | NR                          | NR                      | NR                               | NR                           | NR                                          | Sample is male PWID   |
| (39)       | Sub-national             | Razavi Khorasan Province | Prison              | 2008             | NR                          | NR                      | 3.2%                        | 5.4%                    | 26.5%                            | 71.2%                        | NR                                          |                       |
| (40)       | Sub-national             | Tehran                   | Detention center    | 2006             | NR                          | NR                      | NR                          | NR                      | NR                               | 80.0%                        | NR                                          |                       |
| (41)       | Sub-national             | Tehran                   | CDDC                | 2006             | NR                          | 24.4%                   | NR                          | NR                      | NR                               | NR                           | NR                                          |                       |
| (42)       | Sub-national             | Tehran                   | Prison              | 2001-2002        | NR                          | NR                      | NR                          | NR                      | NR                               | 78.3%                        | NR                                          |                       |
| (43)       | Sub-national             | Guilan                   | Prison              | 2003             | NR                          | NR                      | NR                          | NR                      | NR                               | 88.9%                        | NR                                          |                       |
| (44)       | Sub-national             | Isfahan                  | Prison              | 2009             | NR                          | NR                      | 6.5%                        | 40.0%                   | 5.9%                             | 60.0%                        | NR                                          | Sample is female only |
| (45)       | Sub-national             | Isfahan                  | correctional center | 2008-2009        | NR                          | NR                      | NR                          | NR                      | 2.6%                             | 50.0%                        | NR                                          |                       |
| (46)       | Sub-national             | Isfahan                  | correctional center | 2008-2009        | NR                          | NR                      | NR                          | 13.9%                   | NR                               | NR                           | NR                                          |                       |
| (47)       | National                 | NA                       | Prison              | 2003             | NR                          | 14.0%                   | 2.8%                        | 4.0%                    | 18.3%                            | 76.0%                        | NR                                          |                       |
| (48)       | Sub-national             | Tehran                   | Prison              | 2013-2014        | NR                          | 8.3%                    | NR                          | NR                      | NR                               | NR                           | NR                                          | Sample is male only   |
| (49)       | National                 | NA                       | Prison              | 1999             | NR                          | 1.56%                   | NR                          | NR                      | NR                               | NR                           | NR                                          |                       |
| (49)       | National                 | NA                       | Prison              | 2000             | NR                          | 1.81%                   | NR                          | NR                      | NR                               | NR                           | NR                                          |                       |
| (49)       | National                 | NA                       | Prison              | 2001             | NR                          | 3.12%                   | NR                          | NR                      | NR                               | NR                           | NR                                          |                       |

| Study Data                                                                                                |                          |                   |                   |                  | HIV prevalence              |                         | HBV prevalence                                            |                         | PWID HCV prevalence                                             |                              | Coverage of HIV, HBV, HCV prevention & care | Comments                                                              |
|-----------------------------------------------------------------------------------------------------------|--------------------------|-------------------|-------------------|------------------|-----------------------------|-------------------------|-----------------------------------------------------------|-------------------------|-----------------------------------------------------------------|------------------------------|---------------------------------------------|-----------------------------------------------------------------------|
| Ref                                                                                                       | National or Sub-national | Subnational area  | Facility Type     | Year(s) of study | non-PWID HIV prevalence (%) | PWID HIV prevalence (%) | non-PWID HBV prevalence (%)                               | PWID HBV prevalence (%) | non-PWID anti-HCV prevalence (%)                                | PWID anti-HCV prevalence (%) |                                             |                                                                       |
| (49)                                                                                                      | National                 | NA                | Prison            | 2002             | NR                          | 3.83%                   | NR                                                        | NR                      | NR                                                              | NR                           | NR                                          |                                                                       |
| (49)                                                                                                      | National                 | NA                | Prison            | 2003             | NR                          | 2.78%                   | NR                                                        | NR                      | NR                                                              | NR                           | NR                                          |                                                                       |
| (49)                                                                                                      | National                 | NA                | Prison            | 2004             | NR                          | 3.05%                   | NR                                                        | NR                      | NR                                                              | NR                           | NR                                          |                                                                       |
| (49)                                                                                                      | National                 | NA                | Prison            | 2005             | NR                          | 3.24%                   | NR                                                        | NR                      | NR                                                              | NR                           | NR                                          |                                                                       |
| (49)                                                                                                      | National                 | NA                | Prison            | 2006             | NR                          | 2.83%                   | NR                                                        | NR                      | NR                                                              | NR                           | NR                                          |                                                                       |
| (49)                                                                                                      | National                 | NA                | Prison            | 2007             | NR                          | 1.71%                   | NR                                                        | NR                      | NR                                                              | NR                           | NR                                          |                                                                       |
| (49)                                                                                                      | National                 | NA                | Prison            | 2008             | NR                          | 2.01%                   | NR                                                        | NR                      | NR                                                              | NR                           | NR                                          |                                                                       |
| (49)                                                                                                      | National                 | NA                | Prison            | 2009             | NR                          | 1.54%                   | NR                                                        | NR                      | NR                                                              | NR                           | NR                                          |                                                                       |
| (49)                                                                                                      | National                 | NA                | Prison            | 2010             | NR                          | 1.37%                   | NR                                                        | NR                      | NR                                                              | NR                           | NR                                          |                                                                       |
| (49)                                                                                                      | National                 | NA                | Prison            | 2011             | NR                          | 1.28%                   | NR                                                        | NR                      | NR                                                              | NR                           | NR                                          | MMT: provided to 38,256 by 2011; VCT available in all prisons by 2011 |
| (50)                                                                                                      | Sub-national             | Sari              | CDDC              | 2001-2003        | NR                          | NR                      | NR                                                        | NR                      | 10.5%                                                           | 77.0%                        | NR                                          |                                                                       |
| (51)                                                                                                      | Sub-national             | Southern Khorasan | Prison            | 2009-2010        | NR                          | NR                      | 9.4%                                                      | 8.5%                    | 6.1%                                                            | 20.3%                        | NR                                          |                                                                       |
| (52)                                                                                                      | Sub-national             | Tehran            | CDDC              | 2001-2002        | NR                          | 17.0%                   | NR                                                        | 4.5%                    | NR                                                              | 80.5%                        | NR                                          | Sample is PWID                                                        |
| <b>Pakistan</b>                                                                                           |                          |                   |                   |                  |                             |                         |                                                           |                         |                                                                 |                              |                                             |                                                                       |
| (53)                                                                                                      | Sub-national             | Karachi           | Central Prison    | NR               | NR                          | NR                      | NR                                                        | NR                      | 2.0%                                                            | 84.2%                        | NR                                          |                                                                       |
| <b><i>Pooled prevalence ratio among PWID compared to non-PWID in the Middle-East and North Africa</i></b> |                          |                   |                   |                  | <i>Insufficient data</i>    |                         | <i>1.7 (95%CI: 0.9-3.3; p=0.09; I<sup>2</sup>: 54.0%)</i> |                         | <i>4.1 (95%CI: 2.5 – 6.7; p&lt;0.001; I<sup>2</sup>: 93.5%)</i> |                              |                                             |                                                                       |
| <b>NORTH AMERICA</b>                                                                                      |                          |                   |                   |                  |                             |                         |                                                           |                         |                                                                 |                              |                                             |                                                                       |
| <b>Canada</b>                                                                                             |                          |                   |                   |                  |                             |                         |                                                           |                         |                                                                 |                              |                                             |                                                                       |
| (54)                                                                                                      | Sub-national             | Ontario           | Remand Facilities | 2003-2004        | 0.7%                        | 5.7%                    | NR                                                        | NR                      | 4.1%                                                            | 54.7%                        | NR                                          |                                                                       |
| (55)                                                                                                      | Sub-national             | Quebec (province) | Provincial Prison | 2003             | 0.5%                        | 10.2%                   | NR                                                        | NR                      | 2.7%                                                            | 55.6%                        | NR                                          |                                                                       |

| Study Data |                          |                                         |                              |                  |                             |                         |                             |                         |                                  |                              |                                                                                                                  |                                   |
|------------|--------------------------|-----------------------------------------|------------------------------|------------------|-----------------------------|-------------------------|-----------------------------|-------------------------|----------------------------------|------------------------------|------------------------------------------------------------------------------------------------------------------|-----------------------------------|
| Ref        | National or Sub-national | Subnational area                        | Facility Type                | Year(s) of study | HIV prevalence              |                         | HBV prevalence              |                         | PWID HCV prevalence              |                              | Coverage of HIV, HBV, HCV prevention & care                                                                      | Comments                          |
|            |                          |                                         |                              |                  | non-PWID HIV prevalence (%) | PWID HIV prevalence (%) | non-PWID HBV prevalence (%) | PWID HBV prevalence (%) | non-PWID anti-HCV prevalence (%) | PWID anti-HCV prevalence (%) |                                                                                                                  |                                   |
| <b>USA</b> |                          |                                         |                              |                  |                             |                         |                             |                         |                                  |                              |                                                                                                                  |                                   |
| (56)       | Sub-national             | Connecticut                             | Correctional facility        | 1994-1996        | 4.2%                        | 20.4%                   | NR                          | NR                      | NR                               | NR                           | NR                                                                                                               | Sample is female only             |
| (57)       | Sub-national             | Texas                                   | Juvenile Detention Center    | 2000-2001        | NR                          | NR                      | NR                          | NR                      | 0.1%                             | 35.8%                        | NR                                                                                                               |                                   |
| (58)       | Sub-national             | New York City                           | Jail                         | 2006             | 5.2%                        | 16.9%                   | NR                          | NR                      | NR                               | NR                           | NR                                                                                                               |                                   |
| (59)       | Sub-national             | King County, Washington                 | Jails                        | 1998-2002        | NR                          | 2.5%                    | NR                          | NR                      | NR                               | NR                           | NR                                                                                                               | Sample is PWID                    |
| (60)       | Sub-national             | Massachusetts                           | County Correctional Facility | 2009-2011        | 1.2%                        | 0.3%                    | NR                          | NR                      | 3.6%                             | 38.0%                        | 22% accepted HCV screening; 25% accepted HIV screening; 38% of HCV infected prisoners received post-release care |                                   |
| (61)       | Sub-national             | California                              | Correctional facility        | NR               | NR                          | NR                      | NR                          | NR                      | 10.2%                            | 66.2%                        | NR                                                                                                               |                                   |
| (62)       | Sub-national             | Rhode Island                            | Jail and Prison facility     | 1996-1997        | NR                          | NR                      | 2.8%                        | 8.6%                    | 6.9%                             | 42.4%                        | NR                                                                                                               | Sample is female recidivists only |
| (63)       | Sub-national             | Rhode Island                            | Jail and Prison facility     | 1998-2000        | NR                          | NR                      | NR                          | NR                      | 17.0%                            | 84.9%                        | NR                                                                                                               |                                   |
| (64)       | Sub-national             | Florida, Louisiana, New York, Wisconsin | Jail                         | 2003-2006        | 1.3%                        | 1.4%                    | NR                          | NR                      | NR                               | NR                           | NR                                                                                                               |                                   |
| (65)       | Sub-national             | North Carolina                          | Prison                       | 2004-2006        | 3.2%                        | 7.4%                    | NR                          | NR                      | NR                               | NR                           | NR                                                                                                               |                                   |
| (66)       | National                 | NA                                      | Correctional facility        | 2007             | 0.9%                        | 1.0%                    | NR                          | NR                      | NR                               | NR                           | NR                                                                                                               |                                   |

| Study Data                                                                      |                          |                  |               |                                                   | HIV prevalence              |                         | HBV prevalence              |                         | PWID HCV prevalence                     |                              | Coverage of HIV, HBV, HCV prevention & care | Comments               |
|---------------------------------------------------------------------------------|--------------------------|------------------|---------------|---------------------------------------------------|-----------------------------|-------------------------|-----------------------------|-------------------------|-----------------------------------------|------------------------------|---------------------------------------------|------------------------|
| Ref                                                                             | National or Sub-national | Subnational area | Facility Type | Year(s) of study                                  | non-PWID HIV prevalence (%) | PWID HIV prevalence (%) | non-PWID HBV prevalence (%) | PWID HBV prevalence (%) | non-PWID anti-HCV prevalence (%)        | PWID anti-HCV prevalence (%) |                                             |                        |
| (67)                                                                            | Sub-national             | Wisconsin        | Prison        | 2014-2015                                         | NR                          | NR                      | NR                          | NR                      | 5.3%                                    | 51.8%                        | NR                                          |                        |
| <b>Pooled prevalence ratio among PWID compared to non-PWID in North America</b> |                          |                  |               | 2.9 (95%CI: 1.6-5.2; $p < 0.001$ ; $I^2$ : 96.3%) |                             |                         | Insufficient data           |                         | 11.3 (95%CI: 6.3 – 20.3; $I^2$ : 96.4%) |                              |                                             |                        |
| <b>WESTERN EUROPE</b>                                                           |                          |                  |               |                                                   |                             |                         |                             |                         |                                         |                              |                                             |                        |
| <b>England</b>                                                                  |                          |                  |               |                                                   |                             |                         |                             |                         |                                         |                              |                                             |                        |
| (68)                                                                            | Sub-national             | County of Surrey | Prison        | NR                                                | NR                          | NR                      | NR                          | NR                      | NR                                      | 32.6%                        | NR                                          |                        |
| <b>Germany</b>                                                                  |                          |                  |               |                                                   |                             |                         |                             |                         |                                         |                              |                                             |                        |
| (69)                                                                            | Sub-national             | Berlin           | Prison        | 1998-1999                                         | NR                          | 18.0%                   | NR                          | 53.0%                   | NR                                      | 83.0%                        | Introduced counseling, NSP                  |                        |
| <b>Northern Ireland</b>                                                         |                          |                  |               |                                                   |                             |                         |                             |                         |                                         |                              |                                             |                        |
| (70)                                                                            | National                 |                  | Prison        | 2004                                              | 0.0%                        | 0.0%                    | 0.5%                        | 2.8%                    | 0.7%                                    | 2.8%                         | NR                                          |                        |
| <b>Ireland</b>                                                                  |                          |                  |               |                                                   |                             |                         |                             |                         |                                         |                              |                                             |                        |
| (71)                                                                            | National                 | NA               | Prison        | 2011                                              | 0.5%                        | 6.0%                    | NR                          | NR                      | 3.0%                                    | 41.5%                        | MMT: 13%                                    |                        |
| <b>Italy</b>                                                                    |                          |                  |               |                                                   |                             |                         |                             |                         |                                         |                              |                                             |                        |
| (72)                                                                            | National                 | NA               | Prisons       | 2001-2002                                         | 2.4%                        | 18.2%                   | 50.7%                       | 57.1%                   | 22.1%                                   | 74.7%                        | NR                                          |                        |
| <b>Netherlands</b>                                                              |                          |                  |               |                                                   |                             |                         |                             |                         |                                         |                              |                                             |                        |
| (73)                                                                            | Sub-national             | Southern         | Prison        | 2010                                              | 0.0%                        | 0.0%                    | 5.0%                        | 42.1%                   | 2.6%                                    | 40.5%                        | NR                                          | Sample was male only   |
| <b>Portugal</b>                                                                 |                          |                  |               |                                                   |                             |                         |                             |                         |                                         |                              |                                             |                        |
| (74)                                                                            | Sub-national             | NR               | Prisons       | 2005                                              | 5.7%                        | 44.4%                   | NR                          | NR                      | 3.5%                                    | 68.9%                        | NR                                          | Sample was female only |
| <b>Scotland</b>                                                                 |                          |                  |               |                                                   |                             |                         |                             |                         |                                         |                              |                                             |                        |
| (75)                                                                            | National                 | NA               | Prison        | 2010-2011                                         | NR                          | NR                      | NR                          | NR                      | 3.0%                                    | 53%                          | MMT: 57%                                    |                        |
| <b>Spain</b>                                                                    |                          |                  |               |                                                   |                             |                         |                             |                         |                                         |                              |                                             |                        |
| (76)                                                                            | Sub-national             | Alicante         | Prison        | 2001                                              | 1.0%                        | 53.2%                   | NR                          | NR                      | 8.1%                                    | 92.7%                        | NR                                          |                        |
| (77)                                                                            | National                 | NA               | Prisons       | 2008                                              | NR                          | NR                      | 1.8%                        | 4.7%                    | 6.0%                                    | 77.9%                        | Introduced MMT, NSP                         |                        |

| Ref                                                                                       | Study Data               |                  |                 |                  | HIV prevalence                                      |                         | HBV prevalence                                     |                         | PWID HCV prevalence                                  |                              | Coverage of HIV, HBV, HCV prevention & care | Comments |
|-------------------------------------------------------------------------------------------|--------------------------|------------------|-----------------|------------------|-----------------------------------------------------|-------------------------|----------------------------------------------------|-------------------------|------------------------------------------------------|------------------------------|---------------------------------------------|----------|
|                                                                                           | National or Sub-national | Subnational area | Facility Type   | Year(s) of study | non-PWID HIV prevalence (%)                         | PWID HIV prevalence (%) | non-PWID HBV prevalence (%)                        | PWID HBV prevalence (%) | non-PWID anti-HCV prevalence (%)                     | PWID anti-HCV prevalence (%) |                                             |          |
| <b>Pooled prevalence ratio among PWID compared to non-PWID in Western Europe</b>          |                          |                  |                 |                  | 13.4 (95%CI: 5.0-35.9; $p < 0.001$ ; $I^2$ : 86.5%) |                         | 3.2 (95%CI: 0.9-11.4; $p = 0.07$ ; $I^2$ : 89.7%)  |                         | 11.0 (95%CI 5.5 – 21.9; $p < 0.001$ ; $I^2$ : 96.9%) |                              |                                             |          |
| <b>WEST AND CENTRAL AFRICA</b>                                                            |                          |                  |                 |                  |                                                     |                         |                                                    |                         |                                                      |                              |                                             |          |
| <b>Ghana</b>                                                                              |                          |                  |                 |                  |                                                     |                         |                                                    |                         |                                                      |                              |                                             |          |
| (78)                                                                                      | National                 | NA               | Central Prisons | 2004-2005        | 2.8%                                                | 11.4%                   | 12.7%                                              | 49.3%                   | NR                                                   | NR                           | NR                                          |          |
| <b>Pooled prevalence ratio among PWID compared to non-PWID in West and Central Africa</b> |                          |                  |                 |                  | Insufficient Data                                   |                         | Insufficient Data                                  |                         | Insufficient Data                                    |                              |                                             |          |
| <b>Global pooled prevalence ratio among PWID compared to non-PWID:</b>                    |                          |                  |                 |                  | 6.0 (95%CI: 3.8, 9.4; $p < 0.001$ ; $I^2$ : 94.4%)  |                         | 2.0 (95%CI: 1.5, 2.7; $p < 0.001$ ; $I^2$ : 90.5%) |                         | 8.1 (95%CI: 6.4, 10.4; $p < 0.001$ ; $I^2$ : 95.8%)  |                              |                                             |          |

Notes: Ref: Reference; NA: Not applicable; NR: Not reported; CDDC: Compulsory drug detention center; MMT: Methadone maintenance therapy; NSP: Needle and syringe exchange; ART: Antiretroviral therapy; VCT: Voluntary counseling and testing; \* excluded from meta-analysis to avoid over-counting

**Web Figure 2.** Meta-analysis of prevalence ratios of HCV and 95% confidence intervals from research in prisons and closed settings, comparing PWID prisoners to non-injecting prisoners. Note: Articles lacking HCV prevalence information for either PWID or their non-injecting counterparts were excluded from prevalence ratio estimates.

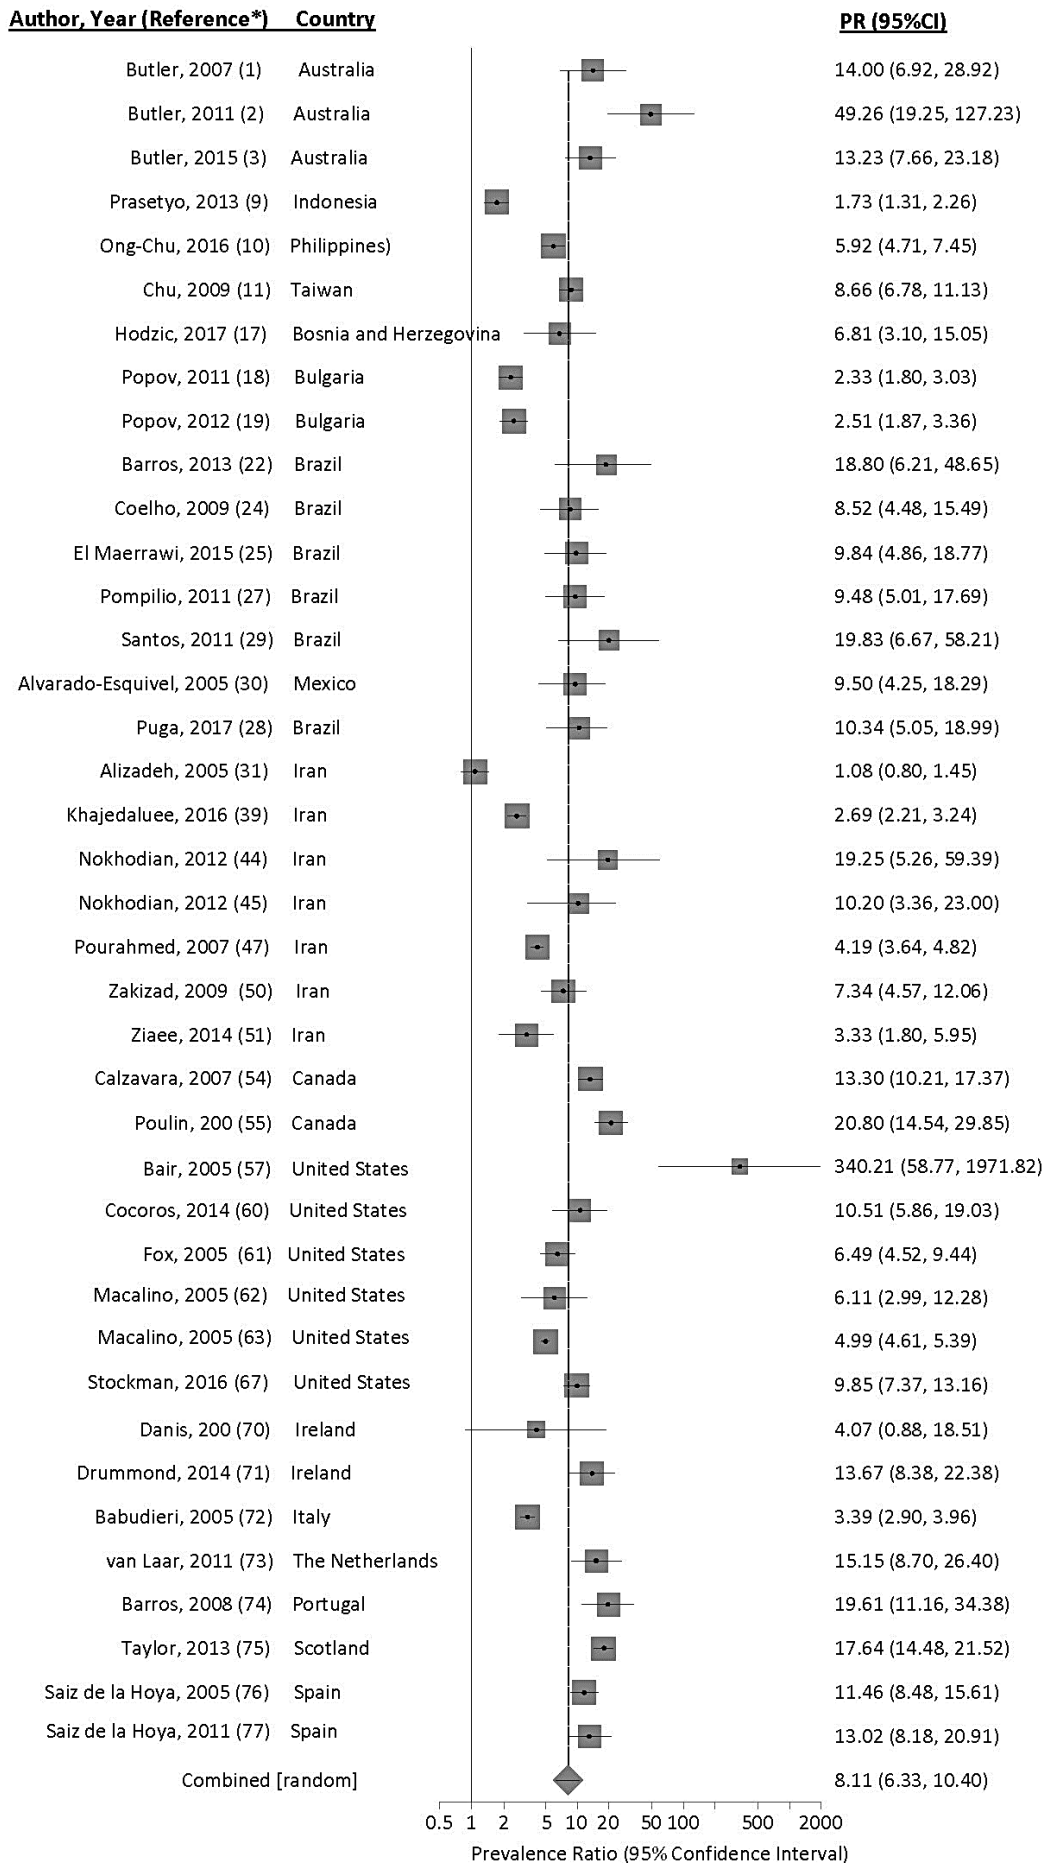

**Web Table 2.** Prevalence of HIV and viral hepatitis among sex workers in prison and other closed settings.

| Ref                                                                                        | Study Data               |                         |                       |                            | SW HIV prevalence                                    |                       | SW HBV prevalence         |                       | SW HCV prevalence              |                            |                                                       | Comments                           |
|--------------------------------------------------------------------------------------------|--------------------------|-------------------------|-----------------------|----------------------------|------------------------------------------------------|-----------------------|---------------------------|-----------------------|--------------------------------|----------------------------|-------------------------------------------------------|------------------------------------|
|                                                                                            | National or Sub-national | Sub-national area       | Facility Type         | Year(s) of data collection | non-SW HIV prevalence (%)                            | SW HIV prevalence (%) | non-SW HBV prevalence (%) | SW HBV prevalence (%) | non-SW anti-HCV prevalence (%) | SW anti-HCV prevalence (%) | Coverage of HIV, HBV, HCV prevention or care among SW |                                    |
| <b>Middle East and North Africa</b>                                                        |                          |                         |                       |                            |                                                      |                       |                           |                       |                                |                            |                                                       |                                    |
| <b>Iran</b>                                                                                |                          |                         |                       |                            |                                                      |                       |                           |                       |                                |                            |                                                       |                                    |
| (44)                                                                                       | Sub-national             | Isfahan                 | Prison                | 2009                       | NR                                                   | NR                    | 8.5%                      | 3.4%                  | 3.9%                           | 24.1%                      | NR                                                    | Sample is female only              |
| <b>Pooled prevalence ratio among SW compared to non-SW in Middle East and North Africa</b> |                          |                         |                       |                            | Insufficient Data                                    |                       | Insufficient Data         |                       | Insufficient Data              |                            |                                                       |                                    |
| <b>North America</b>                                                                       |                          |                         |                       |                            |                                                      |                       |                           |                       |                                |                            |                                                       |                                    |
| <b>USA</b>                                                                                 |                          |                         |                       |                            |                                                      |                       |                           |                       |                                |                            |                                                       |                                    |
| (56)                                                                                       | Sub-national             | Connecticut             | Correctional facility | 1994-1996                  | 5.0%                                                 | 14.8%                 | NR                        | NR                    | NR                             | NR                         | NR                                                    | Sample is female only              |
| (59)                                                                                       | Sub-national             | King County, Washington | Jails                 | 1998-2002                  | 0.5%                                                 | 2.8%                  | NR                        | NR                    | NR                             | NR                         | NR                                                    | Sample is female PWID              |
| (59)                                                                                       | Sub-national             | King County, Washington | Jails                 | 1998-2002                  | 1.9%                                                 | 6.9%                  | NR                        | NR                    | NR                             | NR                         | NR                                                    | Sample is male PWID                |
| (79)                                                                                       | Sub-national             | Los Angeles             | Jail                  | 2000-2006                  | 0.9%                                                 | 2.0%                  | NR                        | NR                    | NR                             | NR                         | NR                                                    | Sample is female only              |
| (65)                                                                                       | Sub-national             | North Carolina          | Prison                | 2004-2006                  | 2.2%                                                 | 5.6%                  | NR                        | NR                    | NR                             | NR                         | NR                                                    |                                    |
| <b>Pooled prevalence ratio among SW compared to non-SW in North America</b>                |                          |                         |                       |                            | 2.7 (95%CI: 2.2-3.2; p<0.001; I <sup>2</sup> : 0.0%) |                       | Insufficient Data         |                       | Insufficient Data              |                            |                                                       |                                    |
| <b>West and Central Africa</b>                                                             |                          |                         |                       |                            |                                                      |                       |                           |                       |                                |                            |                                                       |                                    |
| <b>Ghana</b>                                                                               |                          |                         |                       |                            |                                                      |                       |                           |                       |                                |                            |                                                       |                                    |
| (78)                                                                                       | National                 | NA                      | Central Prisons       | 2004-2005                  | 5.6%                                                 | 11.0%                 | 24.9%                     | 37.0%                 | NR                             | NR                         | NR                                                    | Sample is male and female combined |
| <b>Pooled prevalence ratio among SW compared to non-SW in West and Central Africa</b>      |                          |                         |                       |                            | Insufficient Data                                    |                       | Insufficient Data         |                       | Insufficient Data              |                            |                                                       |                                    |
| <b>Pooled prevalence ratio among SW compared to those not engaged in sex work</b>          |                          |                         |                       |                            | 2.6 (95%CI: 2.2-3.1; p<0.001 I <sup>2</sup> : 0.0%)  |                       | Insufficient data         |                       | Insufficient data              |                            |                                                       |                                    |

Notes: Ref: Reference; NA: Not applicable; NR: Not reported

**Web Table 3.** Prevalence of HIV and viral hepatitis among men who have sex with men in prison and other closed settings.

| Ref                                                                                                                             | Study Data               |                    |                            |                            | MSM HIV prevalence                                        |                        | MSM HBV prevalence         |                        | MSM HCV prevalence              |                             | Coverage of HIV, HBV, HCV prevention or care among MSM | Comments |
|---------------------------------------------------------------------------------------------------------------------------------|--------------------------|--------------------|----------------------------|----------------------------|-----------------------------------------------------------|------------------------|----------------------------|------------------------|---------------------------------|-----------------------------|--------------------------------------------------------|----------|
|                                                                                                                                 | National or Sub-national | Sub-national area  | Facility Type              | Year(s) of data collection | non-MSM HIV prevalence (%)                                | MSM HIV prevalence (%) | non-MSM HBV prevalence (%) | MSM HBV prevalence (%) | non-MSM anti-HCV prevalence (%) | MSM anti-HCV prevalence (%) |                                                        |          |
| <b>ASIA AND PACIFIC</b>                                                                                                         |                          |                    |                            |                            |                                                           |                        |                            |                        |                                 |                             |                                                        |          |
| <b>Australia</b>                                                                                                                |                          |                    |                            |                            |                                                           |                        |                            |                        |                                 |                             |                                                        |          |
| (3)                                                                                                                             | National                 | NA                 | Prison                     | 2013                       | 0.0%                                                      | 0.0%                   | 18.0%                      | 0.0%                   | 30.6%                           | 0.0%                        | NR                                                     |          |
| <b><i>Pooled prevalence ratio among MSM compared to men not reporting same sex practices in Asia and Pacific</i></b>            |                          |                    |                            |                            | <i>Insufficient data</i>                                  |                        | <i>Insufficient data</i>   |                        | <i>Insufficient data</i>        |                             |                                                        |          |
| <b>EAST AND SOUTHERN AFRICA</b>                                                                                                 |                          |                    |                            |                            |                                                           |                        |                            |                        |                                 |                             |                                                        |          |
| <b>Malawi</b>                                                                                                                   |                          |                    |                            |                            |                                                           |                        |                            |                        |                                 |                             |                                                        |          |
| (80)                                                                                                                            | National                 |                    | Central Prisons            | 2011                       | 40.0%                                                     | 57.0%                  | NR                         | NR                     | NR                              | NR                          | NR                                                     |          |
| (80)                                                                                                                            | National                 |                    | Mid-sized Prisons          | 2011                       | 23.0%                                                     | 16.0%                  | NR                         | NR                     | NR                              | NR                          | NR                                                     |          |
| (80)                                                                                                                            | National                 |                    | Small size Prisons         | 2011                       | 10.0%                                                     | 37.0%                  | NR                         | NR                     | NR                              | NR                          | NR                                                     |          |
| <b><i>Pooled prevalence ratio among MSM compared to men not reporting same sex practices in East and Southern Africa</i></b>    |                          |                    |                            |                            | <i>1.7 (95%CI: 0.7-4.0; p=0.65; I<sup>2</sup>: 64.8%)</i> |                        | <i>Insufficient data</i>   |                        | <i>Insufficient data</i>        |                             |                                                        |          |
| <b>EASTERN EUROPE CENTRAL ASIA</b>                                                                                              |                          |                    |                            |                            |                                                           |                        |                            |                        |                                 |                             |                                                        |          |
| <b>Bosnia and Herzegovina</b>                                                                                                   |                          |                    |                            |                            |                                                           |                        |                            |                        |                                 |                             |                                                        |          |
| (17)                                                                                                                            | Sub-national             | Zenica             | High Security Penitentiary | 2013                       | NR                                                        | NR                     | NR                         | NR                     | 15.72%                          | 44.44%                      | NR                                                     |          |
| <b><i>Pooled prevalence ratio among MSM compared to men not reporting same sex practices in Eastern Europe Central Asia</i></b> |                          |                    |                            |                            | <i>Insufficient data</i>                                  |                        | <i>Insufficient data</i>   |                        | <i>Insufficient data</i>        |                             |                                                        |          |
| <b>LATIN AMERICA &amp; CARIBBEAN</b>                                                                                            |                          |                    |                            |                            |                                                           |                        |                            |                        |                                 |                             |                                                        |          |
| <b>Brazil</b>                                                                                                                   |                          |                    |                            |                            |                                                           |                        |                            |                        |                                 |                             |                                                        |          |
| (23)                                                                                                                            | Sub-national             | Sao Paulo          | Prison                     | 2003                       | 5.4%                                                      | 100.0%                 | NR                         | NR                     | 8.4%                            | 100.0%                      | NR                                                     |          |
| (27)                                                                                                                            | Sub-national             | Mato Grosso do Sul | Prison                     | 2009                       | NR                                                        | NR                     | NR                         | NR                     | 4.5%                            | 5.1%                        | NR                                                     |          |



| Ref                                                                                                                       | Study Data               |                               |                                  |                            | MSM HIV prevalence                                |                        | MSM HBV prevalence         |                        | MSM HCV prevalence              |                                                | Coverage of HIV, HBV, HCV prevention or care among MSM | Comments                       |
|---------------------------------------------------------------------------------------------------------------------------|--------------------------|-------------------------------|----------------------------------|----------------------------|---------------------------------------------------|------------------------|----------------------------|------------------------|---------------------------------|------------------------------------------------|--------------------------------------------------------|--------------------------------|
|                                                                                                                           | National or Sub-national | Sub-national area             | Facility Type                    | Year(s) of data collection | non-MSM HIV prevalence (%)                        | MSM HIV prevalence (%) | non-MSM HBV prevalence (%) | MSM HBV prevalence (%) | non-MSM anti-HCV prevalence (%) | MSM anti-HCV prevalence (%)                    |                                                        |                                |
| (29)                                                                                                                      | Sub-national             | Sergipe                       | Prison                           | 2009-2010                  | NR                                                | NR                     | NR                         | NR                     | 22.8%                           | 0.0%                                           | NR                                                     |                                |
| (28)                                                                                                                      | Sub-national             | Mid-West (Mato Grosso do Sul) | Prison                           | 2013-2014                  | 2.7%                                              | 2.6%                   | NR                         | NR                     | NR                              | NR                                             | NR                                                     |                                |
| <b>Jamaica</b>                                                                                                            |                          |                               |                                  |                            |                                                   |                        |                            |                        |                                 |                                                |                                                        |                                |
| (81)                                                                                                                      | Sub-national             | NR                            | Max Security Correctional Center | 2006                       | 2.0%                                              | 25.0%                  | NR                         | NR                     | NR                              | NR                                             | NR                                                     |                                |
| <b>Pooled prevalence ratio among MSM compared to men not reporting same sex practices in Latin America and Caribbean</b>  |                          |                               |                                  |                            | 12.8 (95%CI: 7.5-21.9; $p<0.001$ ; $I^2$ : 87.0%) |                        |                            | Insufficient data      |                                 | 1.4 (95%CI: 0.3-7.4; $p=0.73$ ; $I^2$ : 89.0%) |                                                        |                                |
| <b>MIDDLE EAST AND NORTH AFRICA</b>                                                                                       |                          |                               |                                  |                            |                                                   |                        |                            |                        |                                 |                                                |                                                        |                                |
| <b>Iran</b>                                                                                                               |                          |                               |                                  |                            |                                                   |                        |                            |                        |                                 |                                                |                                                        |                                |
| (42)                                                                                                                      | Sub-national             | Tehran                        | Prison                           | 2001-2002                  | NR                                                | NR                     | NR                         | NR                     | 78.0%                           | 79.2%                                          | NR                                                     | Sample is PWID                 |
| (47)                                                                                                                      | National                 | NA                            | Prison                           | 2003                       | 6.8%                                              | 2.6%                   | NR                         | 1.7%                   | NR                              | 52.0%                                          | NR                                                     |                                |
| (50)                                                                                                                      | Sub-national             | Sari                          | CDDC                             | 2001-2003                  | NR                                                | NR                     | NR                         | NR                     | 34.7%                           | 62.5%                                          | NR                                                     | Sample is people who use drugs |
| (48)                                                                                                                      | Sub-national             | Tehran                        | Prison                           | 2013-2014                  | NR                                                | 3.6%                   | NR                         | NR                     | NR                              | NR                                             | NR                                                     |                                |
| <b>Pooled prevalence ratio among MSM compared to men not reporting same sex practices in Middle East and North Africa</b> |                          |                               |                                  |                            | Insufficient data                                 |                        |                            | Insufficient data      |                                 | Insufficient data                              |                                                        |                                |
| <b>NORTH AMERICA</b>                                                                                                      |                          |                               |                                  |                            |                                                   |                        |                            |                        |                                 |                                                |                                                        |                                |
| <b>USA</b>                                                                                                                |                          |                               |                                  |                            |                                                   |                        |                            |                        |                                 |                                                |                                                        |                                |
| (58)                                                                                                                      | Sub-national             | NYC                           | Jail                             | 2006                       | 5.0%                                              | 34.0%                  | NR                         | NR                     | NR                              | NR                                             | NR                                                     |                                |
| (59)                                                                                                                      | Sub-national             | King County, Washington       | Jail                             | 1998-2002                  | 1.6%                                              | 18.2%                  | NR                         | NR                     | NR                              | NR                                             | NR                                                     | Sample is PWID                 |

| Ref                                                                                                         | Study Data               |                                         |                       |                            | MSM HIV prevalence                                      |                        | MSM HBV prevalence         |                        | MSM HCV prevalence              |                             | Coverage of HIV, HBV, HCV prevention or care among MSM | Comments      |
|-------------------------------------------------------------------------------------------------------------|--------------------------|-----------------------------------------|-----------------------|----------------------------|---------------------------------------------------------|------------------------|----------------------------|------------------------|---------------------------------|-----------------------------|--------------------------------------------------------|---------------|
|                                                                                                             | National or Sub-national | Sub-national area                       | Facility Type         | Year(s) of data collection | non-MSM HIV prevalence (%)                              | MSM HIV prevalence (%) | non-MSM HBV prevalence (%) | MSM HBV prevalence (%) | non-MSM anti-HCV prevalence (%) | MSM anti-HCV prevalence (%) |                                                        |               |
| (61)                                                                                                        | Sub-national             | California                              | Correctional facility | NR                         | NR                                                      | NR                     | NR                         | NR                     | 32.3%                           | 50.0%                       | NR                                                     |               |
| (82)                                                                                                        | Sub-national             | Los Angeles                             | Jail                  | 2000-2005                  | NR                                                      | 13.4%                  | NR                         | NR                     | NR                              | NR                          | 36% of MSM tested for STI/HIV                          | Sample is MSM |
| (64)                                                                                                        | Sub-national             | Florida, Louisiana, New York, Wisconsin | Jail                  | 2003-2006                  | 0.8%                                                    | 7.0%                   | NR                         | NR                     | NR                              | NR                          | NR                                                     |               |
| (65)                                                                                                        | Sub-national             | North Carolina                          | Prison                | 2004-2006                  | 3.2%                                                    | 29.9%                  | NR                         | NR                     | NR                              | NR                          | NR                                                     |               |
| (66)                                                                                                        | National                 | NA                                      | Correctional facility | 2007                       | 0.8%                                                    | 5.2%                   | NR                         | NR                     | NR                              | NR                          | NR                                                     |               |
| <b>Pooled prevalence ratio among MSM compared to men not reporting same sex practices in North America</b>  |                          |                                         |                       |                            | 8.0 (95%CI: 6.8-9.5; p<0.001; I <sup>2</sup> : 36.4%)   |                        |                            | Insufficient data      |                                 | Insufficient data           |                                                        |               |
| <b>WESTERN EUROPE</b>                                                                                       |                          |                                         |                       |                            |                                                         |                        |                            |                        |                                 |                             |                                                        |               |
| <b>Ireland</b>                                                                                              |                          |                                         |                       |                            |                                                         |                        |                            |                        |                                 |                             |                                                        |               |
| (71)                                                                                                        | National                 | NA                                      | Prison                | 2011                       | 1.4%                                                    | 20.0%                  | NR                         | NR                     | 12.5%                           | 6.7%                        | NR                                                     |               |
| <b>Italy</b>                                                                                                |                          |                                         |                       |                            |                                                         |                        |                            |                        |                                 |                             |                                                        |               |
| (72)                                                                                                        | National                 | NA                                      | Prison                | 2001-2002                  | 2.4%                                                    | 50.0%                  | 50.7%                      | 50.0%                  | 22.1%                           | 16.7%                       | NR                                                     |               |
| <b>Netherlands</b>                                                                                          |                          |                                         |                       |                            |                                                         |                        |                            |                        |                                 |                             |                                                        |               |
| (73)                                                                                                        | Sub-national             | Southern                                | Prison                | 2010                       | 0.0%                                                    | 0.0%                   | NR                         | NR                     | NR                              | NR                          | NR                                                     |               |
| <b>Pooled prevalence ratio among MSM compared to men not reporting same sex practices in Western Europe</b> |                          |                                         |                       |                            | 18.2 (95%CI: 8.7-37.8; p<0.001; I <sup>2</sup> : 99.9%) |                        |                            | Insufficient data      |                                 | Insufficient data           |                                                        |               |
| <b>WEST AND CENTRAL AFRICA</b>                                                                              |                          |                                         |                       |                            |                                                         |                        |                            |                        |                                 |                             |                                                        |               |
| <b>Ghana</b>                                                                                                |                          |                                         |                       |                            |                                                         |                        |                            |                        |                                 |                             |                                                        |               |
| (78)                                                                                                        | National                 | NA                                      | Central Prisons       | 2004-2005                  | 4.6%                                                    | 8.9%                   | 19.4%                      | 40.2%                  | NR                              | NR                          | NR                                                     |               |
| <b>Nigeria</b>                                                                                              |                          |                                         |                       |                            |                                                         |                        |                            |                        |                                 |                             |                                                        |               |
| (83)                                                                                                        | Sub-national             | Nasarawa State                          | Prison                | 2007                       | 14.9%                                                   | 43.8%                  | 19.0%                      | 56.3%                  | 12.3%                           | 12.5%                       | NR                                                     |               |

| Ref                                                                                                                  | Study Data               |                   |               |                            | MSM HIV prevalence                                                   |                        | MSM HBV prevalence                                                  |                        | MSM HCV prevalence                                               |                             | Coverage of HIV, HBV, HCV prevention or care among MSM | Comments |
|----------------------------------------------------------------------------------------------------------------------|--------------------------|-------------------|---------------|----------------------------|----------------------------------------------------------------------|------------------------|---------------------------------------------------------------------|------------------------|------------------------------------------------------------------|-----------------------------|--------------------------------------------------------|----------|
|                                                                                                                      | National or Sub-national | Sub-national area | Facility Type | Year(s) of data collection | non-MSM HIV prevalence (%)                                           | MSM HIV prevalence (%) | non-MSM HBV prevalence (%)                                          | MSM HBV prevalence (%) | non-MSM anti-HCV prevalence (%)                                  | MSM anti-HCV prevalence (%) |                                                        |          |
| <i>Pooled prevalence ratio among MSM compared to men not reporting same sex practices in West and Central Africa</i> |                          |                   |               |                            | <i>Insufficient data</i>                                             |                        | <i>Insufficient data</i>                                            |                        | <i>Insufficient data</i>                                         |                             |                                                        |          |
| <b><i>Global pooled prevalence ratio among MSM compared to men not reporting same sex practices</i></b>              |                          |                   |               |                            | <b><i>5.3 (95%CI: 3.5-7.9; p&lt;0.001; I<sup>2</sup>: 91.6%)</i></b> |                        | <b><i>2.1 (95%CI: 1.4, 3.0;p&lt;0.001 I<sup>2</sup>: 53.8%)</i></b> |                        | <b><i>1.5 (95%CI: 1.0-2.2; p=0.05; I<sup>2</sup>: 72.0%)</i></b> |                             |                                                        |          |

Notes: Ref: Reference; NA: Not applicable; NR: Not reported; CDDC: Compulsory Drug Detention Centers

**Web Table 4.** Prevalence of HIV, HBV and HCV among transgender women in prisons and closed settings.

| Ref                                                                                                           | Study Data               |                   |                              |                            | TGW HIV prevalence       |                    | TGW HBV prevalence       |                        | TGW HCV prevalence       |                    | Coverage of HIV, HBV, HCV prevention and care among TGW | Comments |
|---------------------------------------------------------------------------------------------------------------|--------------------------|-------------------|------------------------------|----------------------------|--------------------------|--------------------|--------------------------|------------------------|--------------------------|--------------------|---------------------------------------------------------|----------|
|                                                                                                               | National or Sub-national | Sub-national area | Facility Type                | Year(s) of data collection | non-TGW prevalence (%)   | TGW prevalence (%) | non-TGW prevalence (%)   | TGW HIV prevalence (%) | non-TGW prevalence (%)   | TGW prevalence (%) |                                                         |          |
| <b>LATIN AMERICA &amp; CARIBBEAN</b>                                                                          |                          |                   |                              |                            |                          |                    |                          |                        |                          |                    |                                                         |          |
| <b>Argentina</b>                                                                                              |                          |                   |                              |                            |                          |                    |                          |                        |                          |                    |                                                         |          |
| (84)                                                                                                          | National                 | NA                | Federal prison               | 2011                       | NR                       | 54.0%              | NR                       | NR                     | NR                       | NR                 | NR                                                      |          |
| <b>NORTH AMERICA</b>                                                                                          |                          |                   |                              |                            |                          |                    |                          |                        |                          |                    |                                                         |          |
| <b>USA</b>                                                                                                    |                          |                   |                              |                            |                          |                    |                          |                        |                          |                    |                                                         |          |
| (60)                                                                                                          | Sub-national             | Massachusetts     | County Correctional Facility | 2009-2011                  | NR                       | 0.0%               | NR                       | NR                     | NR                       | NR                 | NR                                                      |          |
| <b><i>Pooled prevalence ratio among TGW compared to those who are not identified as transgender women</i></b> |                          |                   |                              |                            | <i>Insufficient data</i> |                    | <i>Insufficient data</i> |                        | <i>Insufficient data</i> |                    |                                                         |          |

## References:

1. Butler T, Boonwaat L, Hailstone S, Falconer T, Lems P, Ginley T, et al. The 2004 Australian prisons entrants' bloodborne virus and risk behaviour survey. *Aust N Z J Public Health*. 2007;31(1):44-50.
2. Butler T, Lim D, Callander D. National Prison Entrants' Bloodborne Virus & Risk Behaviour Survey 2004, 2007 and 2010: Prevalence of HIV, HBV, HCV and risk behaviours among Australian prison entrants. Sydney, NSW: Kirby Institute (University of South Wales) and National Drug Research Institute (Curtin University), 2011.
3. Butler T. National Prison Entrants' Bloodborne Virus & Risk Behaviour Survey 2004, 2007, 2010 and 2013. Sydney: Kirby Institute (University of South Wales) and National Drug Research Institute (Curtin University);, 2015.
4. Reekie JM, Levy MH, Richards AH, Wake CJ, Siddall DA, Beasley HM, et al. Trends in HIV, hepatitis B and hepatitis C prevalence among Australian prisoners - 2004, 2007, 2010. *The Medical journal of Australia*. 2014;200(5):277-80. Epub 2014/03/20. PubMed PMID: 24641153.
5. Snow KJ, Young JT, Preen DB, Lennox NG, Kinner SA. Incidence and correlates of hepatitis C virus infection in a large cohort of prisoners who have injected drugs. *BMC public health*. 2014;14:830-2458-14-830. doi: 10.1186/1471-2458-14-830 [doi].
6. van Dooren K, Kinner SA, Hellard M. A comparison of risk factors for hepatitis C among young and older adult prisoners. *Journal of correctional health care : the official journal of the National Commission on Correctional Health Care*. 2014;20(4):280-91. doi: 10.1177/1078345814541536 [doi].
7. Wang H, Li G, Brown K, Smith K, Jin X, Dong R, et al. The characteristics and risk factors for HIV infection among Beijing drug users in different settings. *Drug Alcohol Depend*. 2011;113(1):37-45. doi: 10.1016/j.drugalcdep.2010.07.010. PubMed PMID: 20728287.
8. Nelwan EJ, Isa A, Alisjahbana B, Triani N, Djamaris I, Djaja I, et al. Routine or targeted HIV screening of Indonesian prisoners. *Int J Prison Health*. 2016;12(1):17-26. Epub 2016/03/05. doi: 10.1108/ijph-04-2015-0012. PubMed PMID: 26933989.
9. Prasetyo AA, Dirgahayu P, Sari Y, Hudiyono H, Kageyama S. Molecular epidemiology of HIV, HBV, HCV, and HTLV-1/2 in drug abuser inmates in central Javan prisons, Indonesia. *Journal of infection in developing countries*. 2013;7(6):453-67. doi: 10.3855/jidc.2965 [doi].
10. Ong-Chu MC, Lao-Tan JY, Gabriel EA. Prevalence of hepatitis B and C and risk factors among prison inmates in Cebu, Philippines. *Hepatology International*. 2016;10(1):S209-S11. doi: 10.1007/s12072-016-9707-8.
11. Chu FY, Chiang SC, Su FH, Chang YY, Cheng SH. Prevalence of human immunodeficiency virus and its association with hepatitis B, C, and D virus infections among incarcerated male substance abusers in Taiwan. *Journal of medical virology*. 2009;81(6):973-8. doi: 10.1002/jmv.21481 [doi].
12. Hsieh HH, Huang JF, Dai CY, Yu ML, Chuang WL. Hepatitis C virus infection among injection drugs used prisoners with and without human immunodeficiency virus infection. *Hepatology International*. 2013;7:S410-S1.
13. Huang YF, Yang JY, Nelson KE, Kuo HS, Lew-Ting CY, Yang CH, et al. Changes in HIV incidence among people who inject drugs in Taiwan following introduction of a harm reduction program: a study of two cohorts. *PLoS medicine*. 2014;11(4):e1001625. doi: 10.1371/journal.pmed.1001625 [doi].

14. Ko NY, Hsu ST, Chen CH, Lee HC, Ko WC. Heroin dependence and bloodborne virus transmission behaviors for HIV infection among newly incarcerated injection drug users in Taiwan. *Substance use & misuse*. 2011;46(5):591-8. doi: 10.3109/10826084.2010.526798 [doi].
15. Lin CL, Liu CJ, Chen PJ, Lai MY, Chen DS, Kao JH. High prevalence of occult hepatitis B virus infection in Taiwanese intravenous drug users. *Journal of Medical Virology*. 2007;79(11):1674-8. doi: 10.1002/jmv.20985 [doi].
16. Lin CF, Twu SJ, Chen PH, Cheng JS, Wang JD. Prevalence and determinants of hepatitis B antigenemia in 15,007 inmates in Taiwan. *Journal of epidemiology / Japan Epidemiological Association*. 2010;20(3):231-6. doi: JST.JSTAGE/jea/JE20081045 [pii].
17. Hodzic H, Bajramovic A, Obradovic Z, Mahmic-Kaknjo M. Intravenous drugs abuse as the main risk factor of increasing hepatitis C infection prevalence in prisoners in Zenica, Bosnia and Herzegovina. *Medicinski glasnik : official publication of the Medical Association of Zenica-Doboj Canton, Bosnia and Herzegovina*. 2017;14(1):73-8. Epub 2017/02/07. doi: 10.17392/880-16. PubMed PMID: 28165441.
18. Popov G, Plochev K. Prevalence and correlates of hepatitis C virus infection among inmates of Bulgarian prisons. *Clinical Microbiology and Infection*. 2011;17:S753.
19. Popov GT, Plochev KS, Chervenyakova TP. Prevalence of hepatitis C virus infection among juvenile prisoners. *Journal of hepatology*. 2012;56:S546.
20. Kolaric B, Stajduhar D, Gajnik D, Rukavina T, Wiessing L. Seroprevalence of blood-borne infections and population sizes estimates in a population of injecting drug users in Croatia. *Central European journal of public health*. 2010;18(2):104-9.
21. Gough E, Edwards P. HIV seroprevalence and associated risk factors among male inmates at the Belize Central Prison. *Revista panamericana de salud publica = Pan American journal of public health*. 2009;25(4):292-9. doi: S1020-49892009000400002 [pii].
22. Barros LA, Pessoni GC, Teles SA, Souza SM, Matos MA, Martins RM, et al. Epidemiology of the viral hepatitis B and C in female prisoners of Metropolitan Regional Prison Complex in the State of Goias, Central Brazil. *Revista da Sociedade Brasileira de Medicina Tropical*. 2013;46(1):24-9. doi: S0037-86822013000100024 [pii].
23. Coelho HC, Perdoni GC, Neves FR, Passos AD. HIV prevalence and risk factors in a Brazilian penitentiary. *Cadernos de saude publica*. 2007;23(9):2197-204. doi: S0102-311X2007000900027 [pii].
24. Coelho HC, de Oliveira SA, Miguel JC, Oliveira Mde L, Figueiredo JF, Perdoni GC, et al. Predictive markers for hepatitis C virus infection among Brazilian inmates. *Revista da Sociedade Brasileira de Medicina Tropical*. 2009;42(4):369-72. doi: S0037-86822009000400002 [pii].
25. El Maerawi I, Carvalho HB. Prevalence and risk factors associated with HIV infection, hepatitis and syphilis in a state prison of Sao Paulo. *International Journal of STD & AIDS*. 2015;26(2):120-7. doi: 10.1177/0956462414531242 [doi].
26. Falquetto TC, Endringer DC, Andrade TU, Lenz D. Hepatitis c in prisoners and non-prisoners in Colatina, Espirito santo, Brazil. *Brazilian Journal of Pharmaceutical Sciences*. 2013;49(4):737-44.
27. Pompilio MA, Pontes ERJC, Castro ARCM, Andrade SMO, Stief ACF, Martins RMB, et al. Prevalence and epidemiology of chronic hepatitis c among prisoners of Mato Grosso do Sul State, Brazil. *Journal of Venomous Animals and Toxins Including Tropical Diseases*. 2011;17(2):216-22.

28. Puga MA, Bandeira LM, Pompilio MA, Croda J, Rezende GR, Dorisbor LF, et al. Prevalence and Incidence of HCV Infection among Prisoners in Central Brazil. *PloS one*. 2017;12(1):e0169195. Epub 2017/01/07. doi: 10.1371/journal.pone.0169195. PubMed PMID: 28060860; PubMed Central PMCID: PMC5218405.
29. Santos BF, de Santana NO, Franca AV. Prevalence, genotypes and factors associated with HCV infection among prisoners in Northeastern Brazil. *World journal of gastroenterology : WJG*. 2011;17(25):3027-34. doi: 10.3748/wjg.v17.i25.3027 [doi].
30. Alvarado-Esquivel C, Sablon E, Martinez-Garcia S, Estrada-Martinez S. Hepatitis virus and HIV infections in inmates of a state correctional facility in Mexico. *Epidemiology and infection*. 2005;133(4):679-85.
31. Alizadeh AHM, Alavian SM, Jafari K, Yazdi N. Prevalence of hepatitis C virus infection and its related risk factors in drug abuser prisoners in Hamedan - Iran. *World Journal of Gastroenterology*. 2005;11(26):4085-9.
32. Ataei B, Babak A, Yaran M, Kassaian N, Nokhodian Z, Meshkati M, et al. Hepatitis C in intravenous drug users: Seroprevalence and risk factors. *Journal of Isfahan Medical School*. 2011;28(SPEC. ISSUE).
33. Behnaz K, Abdollah A, Fateme F, Mohammadreza R. Prevalence and risk factors of HIV, hepatitis B virus and hepatitis C virus infections in drug addicts among Gorgan prisoners. *Journal of Medical Sciences*. 2007;7(2):252-4.
34. Davoodian P, Dadvand H, Mahoori K, Amoozandeh A, Salavati A. Prevalence of selected sexually and blood-borne infections in Injecting drug abuser inmates of bandar abbas and roodan correction facilities, Iran, 2002. *The Brazilian journal of infectious diseases : an official publication of the Brazilian Society of Infectious Diseases*. 2009;13(5):356-8. doi: 10.1590/S1413-86702009000500008 [doi].
35. Dibaj R, Ataei B, Yaran M, Nokhodian Z, Tayeri K, Ali Z. Prevalence of HIV infection in inmates with history of injection drug use and evaluation of risk factors, in Isfahan, Iran. *Pakistan Journal of Medical Sciences*. 2013;29(1 SUPPL.):399-402.
36. Hosseini M, SeyedAlinaghi S, Kheirandish P, Esmaeli Javid G, Shirzad H, Karami N, et al. Prevalence and correlates of co-infection with human immunodeficiency virus and hepatitis C virus in male injection drug users in Iran. *Archives of Iranian Medicine*. 2010;13(4):318-23. doi: 010134/AIM.0012 [doi].
37. Kassaian N, Adibi P, Kafashaian A, Yaran M, Hassannejad R, Ataei B. Hepatitis C virus and associated risk factors among prison inmates with history of drug injection in Isfahan, Iran. *Hepatology International*. 2013;7:S407.
38. Kazerooni PA, Lari MA, Joolaei H, Parsa N. Knowledge and attitude of male intravenous drug users on HIV/AIDS associated high risk behaviors in Shiraz Pir-Banon jail, Fars Province, Southern Iran. *Iranian Red Crescent Medical Journal*. 2010;12(3):334-6.
39. Khajedaluee M, Babaei A, Vakili R, Valizade N, Homaei Shandiz F, Alavian SM, et al. Sero-Prevalence of Bloodborne Tumor Viruses (HCV, HBV, HTLV-I and KSHV Infections) and Related Risk Factors among Prisoners in Razavi Khorasan Province, Iran, in 2008. *Hepat Mon*. 2016;16(12):e31541. Epub 2017/01/27. doi: 10.5812/hepatmon.31541. PubMed PMID: 28123439; PubMed Central PMCID: PMC5237471.
40. Kheirandish P, SeyedAlinaghi S, Jahani M, Shirzad H, Seyed Ahmadian M, Majidi A, et al. Prevalence and correlates of hepatitis C infection among male injection drug users in detention, Tehran, Iran. *Journal of Urban Health*. 2009;86(6):902-8. doi: 10.1007/s11524-009-9393-0 [doi].

41. Kheirandish P, Seyedalinaghi SA, Hosseini M, Jahani MR, Shirzad H, Foroughi M, et al. Prevalence and correlates of HIV infection among male injection drug users in detention in Tehran, Iran. *Journal of Acquired Immune Deficiency Syndromes*. 2010;53(2):273-5. doi: 10.1097/QAI.0b013e3181be6dde [doi].
42. Mir-Nasseri MM, Poustchi H, Nasseri-Moghadam S, Tavakkoli H, Mohammadkhani A, Afshar P, et al. Hepatitis C seroprevalence among intravenous drug users in Tehran. *Journal of Research in Medical Sciences*. 2008;13(6):295-302.
43. Mohtasham Amiri Z, Rezvani M, Jafari Shakib R, Jafari Shakib A. Prevalence of hepatitis C virus infection and risk factors of drug using prisoners in Guilan province. *Eastern Mediterranean health journal = La revue de sante de la Mediterranee orientale = al-Majallah al-sihhiyah li-sharq al-mutawassit*. 2007;13(2):250-6.
44. Nokhodian Z, Yazdani MR, Yaran M, Shoaie P, Mirian M, Ataei B, et al. Prevalence and Risk Factors of HIV, Syphilis, Hepatitis B and C Among Female Prisoners in Isfahan, Iran. *Hepatitis monthly*. 2012;12(7):442-7. doi: 10.5812/hepatmon.6144 [doi].
45. Nokhodian Z, Ataei B, Kassaian N, Yaran M, Hassannejad R, Adibi P. Seroprevalence and Risk Factors of Hepatitis C Virus among Juveniles in Correctional Center in Isfahan, Iran. *International journal of preventive medicine*. 2012;3(Suppl 1):S113-7.
46. Nokhodian Z, Yaran M, Meshkati M, Ataei B, Adibi P, Ataei B. Prevalence and risk factors of hepatitis B virus infection in incarcerated injection drug users in Isfahan province, Iran. *Hepat Int*. 2013;7(Suppl 1):S1-S754.
47. Pourahmad M, Javady A, Karimi I, Ataei B, Kassaeian N. Seroprevalence of and risk factors associated with hepatitis B, hepatitis C, and human immunodeficiency virus among prisoners in Iran. *Infectious Diseases in Clinical Practice*. 2007;15(6):368-72.
48. SeyedAlinaghi S, Farhoudi B, Mohraz M, Golsoorat Pahlaviani F, Hosseini M, Farnia M, et al. Prevalence and Associated Factors of HIV Infection among Male Prisoners in Tehran, Iran. *Arch Iran Med*. 2017;20(6):356-60. Epub 2017/06/26. doi: 0172006/aim.007. PubMed PMID: 28646844.
49. Shahbazi M, Farnia M, Rahmani K, Moradi G. Trend of HIV/AIDS Prevalence and Related Interventions Administered in Prisons of Iran -13 Years' Experience. *Iranian journal of public health*. 2014;43(4):471-9.
50. Zakizad M, Salmeh F, Yaghoobi T, Yaghoobian M, Nesami MB, Esmaeeli Z, et al. Seroprevalence of hepatitis C infection and associated risk factors among addicted prisoners in Sari-Iran. *Pakistan Journal of Biological Sciences*. 2009;12(14):1012-8.
51. Ziaee M, Sharifzadeh G, Namaee MH, Fereidouni M. Prevalence of HIV and Hepatitis B, C, D Infections and Their Associated Risk Factors among Prisoners in Southern Khorasan Province, Iran. *Iranian journal of public health*. 2014;43(2):229-34.
52. Mir-Nasseri MM, Mohammadkhani A, Tavakkoli H, Ansari E, Poustchi H. Incarceration is a major risk factor for blood-borne infection among intravenous drug users: Incarceration and blood borne infection among intravenous drug users. *Hepatitis monthly*. 2011;11(1):19-22.
53. Butt A, Jafri W, Janjua N, Pasha O. Seroprevalence and risk factors for hepatitis C infection among male prisoners in Karachi, Pakistan. *American Journal of Gastroenterology*. 2010;105:S112.



54. Calzavara L, Ramuscak N, Burchell AN, Swantee C, Myers T, Ford P, et al. Prevalence of HIV and hepatitis C virus infections among inmates of Ontario remand facilities. *CMAJ : Canadian Medical Association journal = journal de l'Association medicale canadienne*. 2007;177(3):257-61. doi: 177/3/257 [pii].
55. Poulin C, Alary M, Lambert G, Godin G, Landry S, Gagnon H, et al. Prevalence of HIV and hepatitis C virus infections among inmates of Quebec provincial prisons. *CMAJ : Canadian Medical Association journal = journal de l'Association medicale canadienne*. 2007;177(3):252-6. doi: 177/3/252 [pii].
56. Altice FL, Marinovich A, Khoshnood K, Blankenship KM, Springer SA, Selwyn PA. Correlates of HIV infection among incarcerated women: Implications for improving detection of HIV infection. *Journal of Urban Health*. 2005;82(2):312-26.
57. Bair RM, Baillargeon JG, Kelly PJ, Lerand SJ, Williams JF, Lyerla R, et al. Prevalence and risk factors for hepatitis C virus infection among adolescents in detention. *Archives of Pediatrics & Adolescent Medicine*. 2005;159(11):1015-8. doi: 159/11/1015 [pii].
58. Begier EM, Bennani Y, Forgione L, Punsalang A, Hanna DB, Herrera J, et al. Undiagnosed HIV infection among New York City jail entrants, 2006: results of a blinded serosurvey. *Journal of acquired immune deficiency syndromes (1999)*. 2010;54(1):93-101. doi: 10.1097/QAI.0b013e3181c98fa8 [doi].
59. Burt RD, Thiede H, Barash ET, Sabin K. Recent condom use by arrested injection drug users in King County, Washington, USA. *International Journal of Drug Policy*. 2006;17(3):222-9.
60. Cocoros N, Nettle E, Church D, Bourassa L, Sherwin V, Cranston K, et al. Screening for Hepatitis C as a Prevention Enhancement (SHAPE) for HIV: an integration pilot initiative in a Massachusetts County correctional facility. *Public health reports (Washington, DC: 1974)*. 2014;129 Suppl 1:5-11.
61. Fox RK, Currie SL, Evans J, Wright TL, Tobler L, Phelps B, et al. Hepatitis C virus infection among prisoners in the California State correctional system. *Clinical Infectious Diseases*. 2005;41(2):177-86.
62. Macalino GE, Vlahov D, Dickinson BP, Schwartzapfel B, Rich JD. Community incidence of hepatitis B and C among reincarcerated women. *Clinical infectious diseases : an official publication of the Infectious Diseases Society of America*. 2005;41(7):998-1002. doi: CID36170 [pii].
63. Macalino GE, Dhawan D, Rich JD. A missed opportunity: hepatitis C screening of prisoners. *American Journal of Public Health*. 2005;95(10):1739-40. doi: 95/10/1739 [pii].
64. MacGowan R, Margolis A, Richardson-Moore A, Wang T, Lalota M, French PT, et al. Voluntary rapid human immunodeficiency virus (HIV) testing in jails. *Sexually transmitted diseases*. 2009;36(2 Suppl):S9-13. doi: 10.1097/OLQ.0b013e318148b6b1 [doi].
65. Rosen DL, Schoenbach VJ, Wohl DA, White BL, Stewart PW, Golin CE. Characteristics and behaviors associated with HIV infection among inmates in the North Carolina prison system. *American Journal of Public Health*. 2009;99(6):1123-30. doi: 10.2105/AJPH.2007.133389 [doi].
66. VanHandel M, Beltrami JF, MacGowan RJ, Borkowf CB, Margolis AD. Newly identified HIV infections in correctional facilities, United States, 2007. *American Journal of Public Health*. 2012;102 Suppl 2:S201-4. doi: 10.2105/AJPH.2011.300614 [doi].
67. Stockman LJ, Greer J, Holzmacher R, Dittmann B, Hoftiezer SA, Alsum LE, et al. Performance of Risk-Based and Birth-Cohort Strategies for Identifying Hepatitis C Virus Infection Among People Entering Prison, Wisconsin, 2014. *Public Health Rep*. 2016;131(4):544-51. Epub 2016/07/28. doi: 10.1177/0033354916662212. PubMed PMID: 27453598; PubMed Central PMCID: PMC4937115.

68. Abou-Saleh MT, Rice P, Foley S. Hepatitis C testing in drug users using the dried blood spot test and the uptake of an innovative self-administered DBS test. *Addictive Disorders and their Treatment*. 2013;12(1):40-9.
69. Stark K, Herrmann U, Ehrhardt S, Bienzle U. A syringe exchange programme in prison as prevention strategy against HIV infection and hepatitis B and C in Berlin, Germany. *Epidemiology and Infection*. 2006;134(4):814-9. doi: S0950268805005613 [pii].
70. Danis K, Doherty L, McCartney M, McCarroll J, Kennedy H. Hepatitis and HIV in Northern Ireland prisons: a cross-sectional study. *Eurosurveillance*. 2007;12(1).
71. Drummond A, Codd M, Donnelly N, McCausland D, Mehegan J, Daly L, et al. Study on the prevalence of drug use, including intravenous drug use, and blood-borne viruses among the Irish prisoner population. Dublin: National Advisory Committee on Drugs and Alcohol, 2014.
72. Babudieri S, Longo B, Sarmati L, Starnini G, Dori L, Suligo B, et al. Correlates of HIV, HBV, and HCV infections in a prison inmate population: Results from a multicentre study in Italy. *Journal of Medical Virology*. 2005;76(3):311-7.
73. van Laar M, Cruts A, van Gageldonk A, van Ooyen-Houben M, Croes E, Meijer R, et al. The Netherlands Drug Situation 2010: Report to the EMCDDA. Utrecht: Trimos-Instituut, 2011 22 Dec 2010. Report No.
74. Barros H, Ramos E, Lucas R. A survey of HIV and HCV among female prison inmates in Portugal. *Central European Journal of Public Health*. 2008;16(3):116-20.
75. Taylor A, Munro A, Allen E, Dunleavy K, Cameron S, Miller L, et al. Low incidence of hepatitis C virus among prisoners in Scotland. *Addiction*. 2013;108(7):1296-304. Epub 2013/01/10. doi: 10.1111/add.12107. PubMed PMID: 23297816.
76. Saiz De La Hoya P, Bedia M, Murcia J, Cebria J, Sanchez-Paya J, Portilla J. [Predictive markers of HIV and HCV infection and co-infection among inmates in a Spanish prison]. *Enfermedades Infecciosas y Microbiología Clínica*. 2005;23(2):53-7.
77. Saiz de la Hoya P, Marco A, Garcia-Guerrero J, Rivera A, Prevalhep study g. Hepatitis C and B prevalence in Spanish prisons. *European Journal of Clinical Microbiology & Infectious Diseases* : official publication of the European Society of Clinical Microbiology. 2011;30(7):857-62. doi: 10.1007/s10096-011-1166-5 [doi].
78. Adjei AA, Armah HB, Gbagbo F, Ampofo WK, Boamah I, Adu-Gyamfi C, et al. Correlates of HIV, HBV, HCV and syphilis infections among prison inmates and officers in Ghana: A national multicenter study. *BMC Infectious Diseases*. 2008;8:33-2334-8-33. doi: 10.1186/1471-2334-8-33 [doi].
79. Javanbakht M, Boudov M, Anderson LJ, Malek M, Smith LV, Chien M, et al. Sexually transmitted infections among incarcerated women: findings from a decade of screening in a Los Angeles County Jail, 2002-2012. *American Journal of Public Health*. 2014;104(11):e103-9. doi: 10.2105/AJPH.2014.302186 [doi].
80. Mwapasa V, Chipungu G, Masiye F, Mukaka M. Prevalence and risk factors for HIV, sexually-transmitted infections, and Tuberculosis in Malawian prisons. Malawi Prison Services; UNODC, 2011.
81. Andrinopoulos K, Kerrigan D, Figueroa JP, Reese R, Gaydos CA, Bennett L, et al. Establishment of an HIV/sexually transmitted disease programme and prevalence of infection among incarcerated men in Jamaica. *International Journal of STD & AIDS*. 2010;21(2):114-9. doi: 10.1258/ijsa.2009.008416 [doi].

82. Javanbakht M, Murphy R, Harawa NT, Smith LV, Hayes M, Chien M, et al. Sexually transmitted infections and HIV prevalence among incarcerated men who have sex with men, 2000-2005. *Sexually transmitted diseases*. 2009;36(2 Suppl):S17-21. doi: 10.1097/OLQ.0b013e31815e4152 [doi].
83. Adoga MP, Banwat EB, Forbi JC, Nimzing L, Pam CR, Gyar SD, et al. Human immunodeficiency virus, hepatitis B virus and hepatitis C virus: sero-prevalence, co-infection and risk factors among prison inmates in Nasarawa State, Nigeria. *Journal of infection in developing countries*. 2009;3(7):539-47.
84. Hariga F. Evaluation and recommendations for the improvement of the health programmes, including for the prevention and treatment of drug dependence and of HIV and AIDS, implemented in the establishments under the responsibility of the Federal Penitentiary Service in Argentina: A follow-up of the 2008 assessment. Vienna: UNODC; 2011. Available from: [http://www.unodc.org/documents/lpo-brazil/Prision\\_Settings/UNODC\\_report\\_Argentina\\_Health\\_SPF\\_assessment\\_July\\_2011.pdf](http://www.unodc.org/documents/lpo-brazil/Prision_Settings/UNODC_report_Argentina_Health_SPF_assessment_July_2011.pdf).
